# Supplementary material for: Genetic determinants of COVID-19 severity and mortality: ACE1 Alu 287 bp polymorphism and ACE1, ACE2, TMPRSS2 expression in hospitalized patients
Source: PeerJ. 2025 Jan 20;13:e18508. doi: 10.7717/peerj.18508 (PMC11756369; doi:10.7717/peerj.18508)
Supplement: Supplemental Information 1 [file peerj-13-18508-s001.xlsx]

## Sheet: DATA
Cohort	Sample type	Sex	Age	Genotype of the ALU sequence	Allele I dominance model	Allele D dominance model	DeltaCT_ACE2	DeltaCT_TMPRSS2	DeltaCT_ACE1	Symptoms	Fever	Chills	Cough	Sneeze	Sore throat	Painful swallowing	Shortness of breath	Nasal congestion	Runny nose	Sputum	Headache	Irritability and confusion	Anemia	Nausea	Vomiting	Diarrhea	Conjunctival congestion	Rash	Enlarged lymph nodes	Myalgia	Anosmia	Ageusia	Fatigue	Conjunctivitis	Tachycardia	Arthralgia	Earache	Medical care	Emergency medical care	Medical care and hospitalization	Care and interaction in the ward	ICU (Intensive Care Unit)	Days of hospitalization	Respiratory assistance	Use of catheter	Use of mask	Use of mechanical ventilation	Computed Tomography of the Chest	Computed Tomography compatible with COVID-19
Belo Horizonte	Swab	Male	32	D/I	I	D	11.3611	3.47833	5.9501	Yes	No	No	Yes	No	No	No	Yes	No	No	No	No	Yes	No	No	No	Yes	No	No	No	No	No	No	No	No	No	No	No	Yes	Yes	Yes	Yes	Yes	28	Yes	Yes	Yes	Yes	No	No
Belo Horizonte	Swab	Female	62	D/I	I	D	12.7084	10.9382	8.05147	Yes	Yes	No	Yes	No	No	No	Yes	No	No	No	Yes	No	No	Yes	Yes	No	No	No	No	Yes	Yes	Yes	No	No	No	Yes	No	Yes	Yes	Yes	Yes	No	2	Yes	Yes	No	No	No	No
Belo Horizonte	Swab	Female	74	D/I	I	D	20.8503	6.3459	5.75587	Yes	Yes	No	Yes	No	No	No	Yes	No	No	No	No	No	Yes	Yes	Yes	Yes	No	No	No	Yes	No	No	No	No	No	Yes	No	Yes	Yes	Yes	Yes	No	10	Yes	Yes	No	No	No	No
Belo Horizonte	Swab	Male	51	D/I	I	D	10.8184	3.38239	9.38821	Yes	Yes	No	Yes	No	No	No	Yes	Yes	Yes	No	Yes	No	No	No	No	No	No	No	No	No	No	No	No	No	No	No	No	Yes	Yes	Yes	Yes	No	9	Yes	Yes	No	No	Yes	Yes
Belo Horizonte	Swab	Male	26	I/I	I	I	15.792	4.68829	12.8679	Yes	Yes	No	Yes	No	Yes	Yes	Yes	No	No	No	Yes	No	No	Yes	Yes	Yes	No	No	No	Yes	No	No	No	No	No	Yes	No	Yes	Yes	Yes	Yes	No	9	Yes	Yes	Yes	No	No	No
Belo Horizonte	Swab	Female	59	D/I	I	D	19.8131	5.02841		Yes	No	No	Yes	No	Yes	Yes	Yes	Yes	Yes	No	Yes	No	Yes	Yes	Yes	No	No	No	No	Yes	Yes	Yes	No	No	No	Yes	No	Yes	Yes	Yes	Yes	No	2	Yes	Yes	No	No	No	No
Belo Horizonte	Swab	Male	44	D/I	I	D	10.5848	10.5848	0.39497	Yes	Yes	No	Yes	No	No	No	Yes	No	No	No	Yes	No	No	No	No	Yes	No	No	No	Yes	Yes	Yes	No	No	No	Yes	No	Yes	Yes	Yes	Yes	No	10	Yes	Yes	No	No	No	No
Belo Horizonte	Swab	Male	63	D/I	I	D				Yes	Yes	No	No	No	No	No	Yes	No	No	No	No	No	No	No	No	No	No	No	No	Yes	Yes	No	No	No	No	Yes	No	Yes	Yes	Yes	Yes	Yes	14	Yes	Yes	Yes	Yes	No	No
Belo Horizonte	Swab	Male	36	D/I	I	D	17.769	7.40407	11.1752	Yes	Yes	No	No	No	No	No	No	No	No	No	Yes	No	Yes	Yes	Yes	Yes	No	No	No	No	Yes	No	No	No	No	No	No	Yes	Yes	Yes	Yes	Yes	8	Yes	Yes	Yes	No	No	No
Belo Horizonte	Swab	Male	41	D/I	I	D	19.0015	6.90059	5.03728	Yes	Yes	No	Yes	No	No	No	Yes	No	No	No	Yes	No	Yes	No	No	No	No	No	No	Yes	No	No	No	No	No	Yes	No	Yes	Yes	Yes	Yes	Yes	14	Yes	Yes	Yes	No	No	No
Belo Horizonte	Swab	Male	67	D/I	I	D				Yes	Yes	No	Yes	No	Yes	Yes	Yes	No	No	No	No	No	No	No	No	No	No	No	No	No	No	No	No	No	No	No	No	Yes	Yes	Yes	Yes	No	3	Yes	Yes	No	No	No	No
Belo Horizonte	Swab	Male	44	D/D	D	D	4.66663	4.66663	5.18403	Yes	Yes	No	No	No	No	No	Yes	No	No	No	No	No	Yes	No	No	No	No	No	No	No	No	No	No	No	No	No	No	Yes	Yes	Yes	Yes	No	3	Yes	Yes	No	No	No	No
Belo Horizonte	Swab	Female	61	D/D	D	D	17.7784	11.2601	12.6117	Yes	Yes	No	Yes	No	No	No	No	No	No	No	Yes	No	Yes	Yes	Yes	Yes	No	No	No	Yes	Yes	Yes	No	No	No	Yes	No	Yes	Yes	Yes	Yes	No	3	Yes	Yes	No	No	No	No
Belo Horizonte	Swab	Male	74	D/I	I	D	17.3341	2.35323		Yes	No	No	No	No	No	No	No	No	No	No	Yes	No	No	No	No	Yes	No	No	No	Yes	No	No	No	No	No	Yes	No	Yes	Yes	Yes	Yes	No	4	Yes	Yes	No	No	Yes	Yes
Belo Horizonte	Swab	Female	69	D/I	I	D	15.2187	4.84985	6.53327	Yes	Yes	No	No	No	No	No	No	No	No	No	Yes	No	No	No	No	No	No	No	No	Yes	No	No	No	No	No	Yes	No	Yes	Yes	Yes	Yes	Yes	15	Yes	Yes	No	Yes	Yes	Yes
Belo Horizonte	Swab	Male	37	D/I	I	D	18.7648	5.19597	11.2554	Yes	No	No	No	No	No	No	Yes	No	No	No	No	No	No	No	No	Yes	No	No	No	No	No	No	No	No	No	No	No	Yes	Yes	Yes	Yes	No	4	Yes	Yes	No	No	Yes	Yes
Belo Horizonte	Swab	Female	39	D/I	I	D	20.8156	15.0611	15.3874	Yes	Yes	No	Yes	No	No	No	No	Yes	Yes	No	Yes	No	Yes	No	No	No	No	No	No	Yes	No	No	No	No	No	Yes	No	Yes	Yes	Yes	Yes	Yes	9	Yes	Yes	No	Yes	No	No
Belo Horizonte	Swab	Female	42	D/D	D	D	17.1876	5.09528	11.8568	Yes	Yes	No	Yes	No	No	No	No	No	No	No	Yes	No	No	No	No	Yes	No	No	No	Yes	No	No	No	No	No	Yes	No	Yes	Yes	Yes	Yes	Yes	13	Yes	Yes	Yes	No	Yes	Yes
Belo Horizonte	Swab	Female	40	D/I	I	D	17.5459	4.27326	5.46364	Yes	No	No	Yes	No	No	No	Yes	Yes	Yes	No	Yes	No	No	No	No	No	No	No	No	Yes	No	No	No	No	No	Yes	No	Yes	Yes	Yes	Yes	Yes	8	Yes	Yes	Yes	No	Yes	Yes
Belo Horizonte	Swab	Male	40	D/D	D	D	17.4696	4.35872		Yes	Yes	No	Yes	No	Yes	Yes	Yes	No	No	No	Yes	No	No	No	No	Yes	No	No	No	Yes	Yes	Yes	No	No	No	Yes	No	Yes	Yes	Yes	Yes	Yes	20	Yes	Yes	Yes	Yes	Yes	Yes
Belo Horizonte	Swab	Female	54	D/D	D	D	17.6561	4.72938		Yes	Yes	No	Yes	No	No	No	No	No	No	No	Yes	No	No	Yes	Yes	Yes	No	No	No	Yes	No	No	No	No	No	Yes	No	Yes	Yes	Yes	Yes	No	11	Yes	Yes	No	No	No	No
Belo Horizonte	Swab	Female	41	D/I	I	D	17.8868	4.14084		Yes	Yes	No	Yes	No	Yes	Yes	Yes	No	No	No	Yes	No	Yes	No	No	No	No	No	No	Yes	Yes	No	No	No	No	Yes	No	Yes	Yes	Yes	Yes	Yes	28	Yes	Yes	Yes	Yes	Yes	Yes
Belo Horizonte	Swab	Female	50	I/I	I	I			5.42513	Yes	Yes	No	Yes	No	No	No	No	No	No	No	Yes	No	No	Yes	Yes	No	No	No	No	Yes	No	No	No	No	No	Yes	No	Yes	Yes	Yes	Yes	No	6	Yes	Yes	No	No	Yes	Yes
Belo Horizonte	Swab	Male	48	D/D	D	D	3.39159	15.4309	11.5508	Yes	Yes	No	Yes	No	No	No	Yes	No	No	No	Yes	No	No	Yes	Yes	No	No	No	No	Yes	No	No	No	No	No	Yes	No	Yes	Yes	Yes	Yes	Yes	28	Yes	Yes	No	Yes	Yes	Yes
Belo Horizonte	Swab	Male	62	I/I	I	I	6.8026	6.8026		Yes	Yes	No	No	No	No	No	No	No	No	No	No	No	No	No	No	Yes	No	No	No	No	No	No	No	No	No	No	No	Yes	Yes	Yes	Yes	No	25	Yes	Yes	No	No	Yes	Yes
Belo Horizonte	Swab	Female	52	D/D	D	D	4.86509	10.8752	5.38285	Yes	Yes	No	No	No	No	No	No	No	No	No	Yes	No	No	No	No	No	No	No	No	Yes	Yes	No	No	No	No	Yes	No	Yes	Yes	Yes	Yes	No	5	Yes	Yes	No	No	Yes	Yes
Belo Horizonte	Swab	Male	54	D/I	I	D				Yes	No	No	Yes	No	No	No	Yes	No	No	No	Yes	No	Yes	No	No	No	No	No	No	Yes	No	No	No	No	No	Yes	No	Yes	Yes	Yes	Yes	Yes	14	Yes	Yes	Yes	Yes	Yes	Yes
Belo Horizonte	Swab	Female	50	D/I	I	D	24.1237	24.1237	17.0215	Yes	Yes	No	Yes	No	Yes	Yes	Yes	Yes	Yes	No	Yes	No	No	Yes	Yes	Yes	No	No	No	Yes	Yes	Yes	No	No	No	Yes	No	Yes	Yes	Yes	Yes	No	9	Yes	Yes	No	No	No	No
Belo Horizonte	Swab	Female	65	D/I	I	D	4.76946	4.76946	11.9609	Yes	Yes	No	Yes	No	No	No	Yes	No	No	No	Yes	No	No	Yes	Yes	Yes	No	No	No	Yes	No	No	No	No	No	Yes	No	Yes	Yes	Yes	Yes	Yes	13	Yes	Yes	Yes	No	Yes	Yes
Belo Horizonte	Swab	Male	46	D/I	I	D			8.28602	Yes	Yes	No	No	No	Yes	Yes	Yes	No	No	No	No	No	No	No	No	Yes	No	No	No	Yes	No	No	No	No	No	Yes	No	Yes	Yes	Yes	Yes	No	5	Yes	Yes	No	No	No	No
Belo Horizonte	Swab	Female	49	D/D	D	D	11.5783	11.5783	8.68648	Yes	Yes	No	Yes	No	No	No	No	No	No	No	Yes	No	No	No	No	No	No	No	No	Yes	No	No	No	No	No	Yes	No	Yes	Yes	Yes	Yes	No	5	Yes	Yes	No	No	No	No
Belo Horizonte	Swab	Male	80	I/I	I	I	13.2291	3.10877	13.1944	Yes	Yes	No	Yes	No	No	No	No	No	No	No	Yes	No	Yes	Yes	Yes	No	No	No	No	Yes	No	No	No	No	No	Yes	No	Yes	Yes	Yes	Yes	No	15	Yes	Yes	No	No	Yes	Yes
Belo Horizonte	Swab	Female	65	I/I	I	I	16.9485	12.9515	14.833	Yes	No	No	Yes	No	No	No	Yes	No	No	No	No	No	No	No	No	No	No	No	No	Yes	Yes	No	No	No	No	Yes	No	Yes	Yes	Yes	Yes	No	2	Yes	Yes	No	No	No	No
Belo Horizonte	Swab	Male	54	D/I	I	D	12.6417	12.6417	12.2217	Yes	Yes	No	Yes	No	No	No	No	No	No	No	Yes	No	No	Yes	Yes	Yes	No	No	No	Yes	No	No	No	No	No	Yes	No	Yes	Yes	Yes	Yes	Yes		Yes	Yes	No	No	No	No
Belo Horizonte	Swab	Female	57	I/I	I	I	12.3049	12.3049	10.7435	Yes	No	No	No	No	No	No	Yes	No	No	No	No	No	Yes	No	No	Yes	No	No	No	No	No	No	Yes	No	Yes	No	No	Yes	Yes	Yes	Yes	No	6	Yes	Yes	No	No	Yes	Yes
Belo Horizonte	Swab	Female	53	D/D	D	D	0.139336	0.139336	1.97712	Yes	Yes	No	Yes	No	No	No	Yes	No	No	Yes	Yes	No	Yes	No	No	Yes	No	No	No	No	No	No	Yes	No	Yes	No	No	Yes	Yes	Yes	Yes	Yes	8	Yes	Yes	Yes	Yes	No
Belo Horizonte	Swab	Male	37	D/D	D	D	7.61301	7.61301	8.54934	Yes	Yes	No	Yes	No	No	No	Yes	No	Yes	No	No	No	Yes	No	No	No	No	No	No	No	No	No	No	No	No	No	No	Yes	Yes	Yes	Yes	No	6	Yes	Yes	Yes		No	No
Belo Horizonte	Swab	Male	29	D/I	I	D	15.4551	13.9681	12.9717	Yes	Yes	No	Yes	No	No	No	Yes	No	No	No	No	No	No	No	No	No	No	No	No	No	No	No	No	No	No	No	No	Yes	Yes	Yes	Yes	No	5	Yes	Yes	No	No	No
Belo Horizonte	Swab	Female	66	D/I	I	D	12.8481	12.8481	13.7277	Yes	Yes	No	Yes	No	Yes	No	Yes	No	Yes	No	No	No	Yes	No	No	No	No	No	No	Yes	No	No	No	No	No	No	No	Yes	Yes	Yes	Yes	Yes	12	Yes	No	Yes	Yes	Yes	Yes
Belo Horizonte	Swab	Female	60	D/I	I	D	15.3367	5.02049	8.61555	Yes	Yes	No	Yes	No	Yes	Yes	Yes	Yes	Yes	No	No	No	No	No	No	No	No	No	No	Yes	No	No	Yes	No	No	No	No	Yes	Yes	Yes	Yes	No	7	Yes	Yes	No	No	Yes	Yes
Belo Horizonte	Swab	Male	42	D/I	I	D	19.6399	11.8219	7.71827	Yes	No	No	Yes	No	Yes	No	Yes	No	Yes	No	No	No	Yes	No	No	No	No	No	No	No	No	No	No	No	No	No	No	Yes	Yes	Yes	Yes	Yes	7	Yes	Yes	Yes	Yes	No	No
Belo Horizonte	Swab	Male	41	D/I	I	D	17.5299	17.5299	15.5002	Yes	Yes	No	No	No	Yes	No	Yes	No	Yes	No	No	No	No	No	No	No	No	No	No	No	No	No	No	No	No	No	No	Yes	Yes	Yes	No	Yes	5	Yes	No	No		No	No
Belo Horizonte	Swab	Female	69	D/I	I	D	10.5328	8.26322	6.93613	Yes	Yes	No	Yes	No	Yes	No	Yes	No	Yes	Yes	No	No	No	No	No	No	No	No	No	Yes	No	No	No	No	No	Yes	No	Yes	Yes	Yes	No	Yes	13	Yes	Yes	No	Yes	No	No
Belo Horizonte	Swab	Female	57	I/I	I	I	12.8817	7.75699	13.0315	Yes	Yes	No	Yes		No	Yes	Yes		Yes	No	No	No	Yes	No	No	No	No	No	No	No	No	No	No	No	No	No	No	Yes	Yes	Yes	Yes	Yes	4	Yes	Yes	Yes	Yes	No	No
Belo Horizonte	Swab	Male	51	D/I	I	D	14.1911	9.18646	17.9312	Yes	No	No	Yes	No	No	No	Yes	No	No	No	No	No	Yes	No	No	No	No	No	No	No	No	No	No	No	No	No	No	Yes	Yes	Yes	Yes	Yes	6	Yes	Yes	No	No	No	No
Belo Horizonte	Swab	Male	58	I/I	I	I	9.44941	6.63861	12.5291	Yes	Yes	No	Yes	No	Yes	No	No	No	Yes	No	No	No	Yes	No	No	No	No	No	No	No	No	No	No	No	No	No	No	Yes	Yes	Yes	Yes	No	8	Yes	Yes	No	No	Yes	Yes
Belo Horizonte	Swab	Male	52	D/I	I	D	6.96596	17.3032	14.6813	Yes	Yes	No	Yes	No	No	No	Yes	No	Yes	No	No	No	No	No	No	No	Yes	No	No	No	No	No	No	Yes	No	No	No	Yes	Yes	Yes	Yes	Yes	10	Yes	Yes	Yes	Yes	No	No
Belo Horizonte	Swab	Female	45	D/D	D	D	4.24336	4.24336	11.8325	Yes	Yes	No	Yes	Yes	No		Yes	Yes	No	No	No	No	Yes	No	No	No	No	No	No	No	No	No	No	No	No	No	No	Yes	Yes	Yes	Yes	Yes	11	Yes	Yes	Yes		No	No
Belo Horizonte	Swab	Male	78	D/D	D	D	12.5811	8.8141	8.97	Yes	Yes	No	Yes	No	Yes	No	Yes	No	No	No	No	No	No	No	No	No	No	No	No	No	No	No	No	No	No	No	No	Yes	Yes	Yes	No	Yes	20	Yes	Yes	Yes	Yes	Yes	Yes
Belo Horizonte	Swab	Male	47	D/D	D	D	16.6175	8.38797	8.31261	Yes	Yes	No	Yes	No	Yes	Yes	Yes	No	No	No	No	No	Yes	No	No	No	No	No	No	No	No	No	No	No	No	No	No	Yes	Yes	Yes	Yes	Yes	3	Yes	Yes	Yes	Yes	Yes	Yes
Belo Horizonte	Swab	Male	76	D/D	D	D	1.40012	1.40012	12.0386	Yes	Yes	No	Yes	No	No	Yes	Yes	No	No	No	No	No	No	No	No	No	No	No	No	No	No	No	No	No	No	No	No	Yes	Yes	Yes	Yes	No	4	Yes	Yes	Yes		No	No
Belo Horizonte	Swab	Male	55	D/D	D	D	10.9577	4.74147	10.3225	Yes	Yes	No	No	Yes	No	Yes	Yes	Yes	Yes	No	No	No	No	No	No	No	No	No	No	No	No	No	No	No	No	No	No	Yes	Yes	Yes	Yes	Yes	3	Yes	No	No	No	No	No
Belo Horizonte	Swab	Male	66	D/D	D	D	12.4116	6.55485	8.7812	Yes	No	No	Yes	No	Yes	Yes	Yes	Yes	Yes	Yes	No	No	Yes	No	No	No	No	No	No	No	Yes	No	Yes	No	Yes	No	No	Yes	Yes	Yes	No	Yes	8	Yes	No	Yes	Yes	No
Belo Horizonte	Swab	Male	46	D/D	D	D	12.8382	9.87828	10.4818	Yes	Yes	No	Yes	No	No	Yes	No	No	Yes	No	No	No	No	No	No	No	No	No	No	Yes	No	No	No	No	No	No	No	Yes	Yes	Yes	Yes	No	5	Yes	Yes	Yes	Yes	Yes	Yes
Belo Horizonte	Swab	Male	67	D/D	D	D	16.8996	16.8996	13.8103	Yes	No	No	Yes	No	Yes	Yes	Yes	No	No	No	Yes	No	Yes	No	No	Yes	No	No	No	Yes	No	No	Yes	No	No	No	No	Yes	Yes	Yes	Yes	Yes	15	Yes	Yes	Yes	No	Yes	Yes
Belo Horizonte	Swab	Female	71	I/I	I	I	10.4077	2.41311	10.5196	Yes	No	No	Yes	No	No	Yes	No	No	Yes	Yes	No	No	No	No	No	No	No	No	No	No	No	No	No	No	No	No	No	Yes	Yes	Yes	Yes	No	6	Yes	No	No		No	No
Belo Horizonte	Swab	Male	48	D/D	D	D	13.5466	8.09646	11.013	Yes	No	No	Yes	No	No	No	Yes	No	No	No	Yes	No	Yes	No	No	Yes	No	No	No	No	No	No	Yes	No	No	No	No	Yes	Yes	Yes	Yes	No	5	Yes	Yes	No	No	No
Belo Horizonte	Swab	Female	49	D/I	I	D	12.8382	9.87828	10.4818	Yes	Yes	No	Yes	No		No	Yes	No	No	No	No	No	Yes	No	No	No	No	No	No	No	No	No	No	No	No	No	No	Yes	Yes	Yes	Yes	No	4	Yes	Yes	Yes	Yes	No	No
Belo Horizonte	Swab	Male	62	D/D	D	D	12.3893	12.3893	12.3893	Yes	Yes	No	Yes	No	No	No	Yes	No	No	No	No	No	Yes	No	No	Yes	No	No	No	No	No	No	Yes	No	No	No	No	Yes	Yes	Yes	Yes	Yes	17	Yes	Yes	Yes	No	No
Belo Horizonte	Swab	Male	66	D/D	D	D	18.9068	18.9068	18.9068	Yes	Yes	No	No	No	No	No	Yes	No	No	Yes	No	No	Yes	No	Yes	No	No	No	No	No	Yes	Yes	Yes	No	No	No	No	Yes	Yes	Yes	Yes	No	15	Yes	Yes	No	No	Yes	Yes
Belo Horizonte	Swab	Male	65	I/I	I	I	19.8669	19.8669	19.8669	Yes	Yes	No	Yes	No	Yes	No	Yes	No	No	No	No	No	Yes	No	No	No	No	No	No	No	No	No	No	No	No	No	No	Yes	Yes	Yes	No	Yes	8	Yes	No	Yes	Yes	Yes	Yes
Belo Horizonte	Swab	Female	53	D/D	D	D	14.4103	3.69169		Yes	Yes	No	Yes	No	No	No	No	No	Yes	Yes	Yes	No	Yes	No	No	No	No	No	No	Yes	No	No	No	No	No	Yes	No	Yes	Yes	Yes	Yes	Yes	12	Yes	Yes	Yes	Yes	No	No
Belo Horizonte	Swab	Female	54	D/D	D	D	10.8209	10.8209	9.89354	Yes	No	No	Yes	No	No	No	Yes	No	Yes	Yes	No	No	No	No	No	No	Yes	No	No	No	No	No	No	Yes	No	Yes	No	Yes	Yes	Yes	Yes	Yes	7	Yes	Yes	No		Yes	Yes
Belo Horizonte	Swab	Female	34	D/D	D	D	8.50038	8.50038	12.8241	Yes	Yes	No	Yes	No	No	Yes	Yes	Yes	Yes	No	No	No	No	No	No	No	No	No	No	No	No	No	No	No	No	No	No	Yes	Yes	Yes	Yes	Yes	21	Yes	Yes	No		Yes	Yes
Belo Horizonte	Swab	Female	51	D/D	D	D	11.5178	0.961763	8.82755	Yes	Yes	No	Yes	Yes	No	Yes	Yes	No	No	No	No	No	No	No	Yes	No	No	No	No	No	No	No	No	No	No	No	No	Yes	Yes	Yes	Yes	Yes	8	Yes	Yes	No		No	No
Belo Horizonte	Swab	Female	49	D/I	I	D	17.6899	10.5056	10.6666	Yes	Yes	No	Yes	No	No	No	Yes	No	No	No	Yes	No	Yes	Yes	Yes	Yes	No	No	No	No	Yes	Yes	No	No	No	No	No	Yes	Yes	Yes	Yes	No	8	Yes	Yes	No	No	Yes	Yes
Belo Horizonte	Swab	Female	57	D/I	I	D	13.3442	13.3442	14.1169	Yes	No	No	Yes	No	No	Yes	Yes	No	Yes	No	No	No	No	No	No	No	No	No	No	No	No	No	No	No	No	Yes	No	Yes	Yes	Yes	Yes	No	10	Yes	Yes	No	No	No	No
Belo Horizonte	Swab	Male	67	D/I	I	D	18.3375	9.10924	10.3294	Yes	Yes	No	Yes	No	Yes	Yes	Yes	No	No	No	No	No	Yes	Yes	No	Yes	No	No	No	No	Yes	Yes	Yes	No	No	No	No	Yes	Yes	Yes	Yes	Yes	16	Yes	Yes	Yes	No	Yes	Yes
Belo Horizonte	Swab	Female	52	I/I	I	I	0.474787	16.4247		Yes	Yes	No	Yes	No		Yes	Yes		Yes	Yes	No	No	No	No		No	No	No	No	No	No	No	No	No	No	No	No	Yes	Yes	Yes	Yes	No	5	Yes	No	Yes	Yes	Yes	Yes
Belo Horizonte	Swab	Female	37	D/D	D	D	19.5672	9.54972	10.9983	Yes	Yes	No	Yes	No	Yes	Yes	Yes	No	No	No	No	No	Yes	No	No	No	No	No	No	Yes	No	No	Yes	No	Yes	No	No	Yes	Yes	Yes	Yes	No	7	Yes	Yes	No	No	Yes	Yes
Belo Horizonte	Swab	Male	26	D/D	D	D	9.86844	5.9866	9.86844	Yes	Yes	No	Yes	Yes	No	No	Yes	Yes	Yes	No	Yes	No	No	No	No	No	No	No	No	No	No	No	No	No	No	No	No	Yes	Yes	Yes	Yes	No	5	Yes	Yes	No	No	Yes	Yes
Belo Horizonte	Swab	Male	42	D/D	D	D	17.0355	13.8396	17.0355	Yes	Yes	No	Yes	No	No	No	Yes	No	No	No	Yes	No	No	No	No	No	No	No	No	Yes	No	No	No	No	No	No	No	Yes	Yes	Yes	Yes	No	6	No	No	No	No	Yes	Yes
Belo Horizonte	Swab	Male	68	D/D	D	D	16.0451	8.35585	16.0451	Yes	Yes	No	Yes	No	No	No	Yes	No	No	No	No	No	Yes	No	No	No	No	No	No	Yes	No	No	No	No	No	No	No	Yes	Yes	Yes	No	Yes	18	Yes	No	Yes	Yes	No
Belo Horizonte	Swab	Female	67	D/D	D	D	10.5894	2.66407	15.1686	Yes	Yes	No	Yes		No	No	Yes	Yes	Yes	No	No	No	Yes	No	No	No	No	No	No	No	No	No	No	No	No	No	No	Yes	Yes	Yes	Yes	No	3	Yes	Yes	No		No	No
Belo Horizonte	Swab	Female	34	D/D	D	D				Yes	Yes	No	Yes	No	No	No	Yes	No	No	No	No	No	Yes	No	No	No	No	No	No	Yes	No	No	Yes	No	No	No	No	Yes	Yes	Yes	Yes	No	5	Yes	Yes	No	No	Yes	Yes
Belo Horizonte	Swab	Female	59	I/I	I	I				Yes	No	No	Yes	No	No	No	Yes	No	No	No	No	No	Yes	No	No	No	No	No	No	Yes	No	No	Yes	No	No	Yes	No	Yes	Yes	Yes	Yes	No	3	Yes	Yes	No	No	Yes	No
Belo Horizonte	Swab	Female	49	D/I	I	D	16.4895	7.73454	16.4895	Yes	Yes	No	Yes	No	No	No	Yes	No	No	No	No	No	Yes	No	No	Yes	No	No	No	Yes	No	No	No	No	No	No	No	Yes	Yes	Yes	Yes	No	3	Yes	Yes	No	No	Yes	Yes
Belo Horizonte	Swab	Female	22	D/I	I	D	14.0263	8.87558	14.0263	Yes	Yes	No	Yes	No	No	No	Yes	No	No	No	No	No	Yes	No	No	No	No	No	No	Yes	No	No	No	No	No	No	No	Yes	Yes	Yes	Yes	No	3	Yes	Yes	No	No	No
Belo Horizonte	Swab	Male	83	D/D	D	D	14.7793	10.3272	4.07127	Yes		No	Yes	Yes		Yes	Yes	Yes	No	Yes	No	No	Yes	No	Yes	No	No	No	No	No	No	No	No	No	No	No	No	Yes	Yes	Yes	Yes	Yes	11	Yes	Yes	No	No	No	No
Belo Horizonte	Swab	Male	44	D/I	I	D	11.9256	6.92482	11.9256	Yes	Yes	Yes	Yes	No	No	No	Yes	No	No	No	No	No	No	No	No	No	No	No	No	Yes	No	No	No	No	No	Yes	No	Yes	Yes	Yes	Yes	No	23	Yes	Yes	No	No	Yes	Yes
Belo Horizonte	Swab	Female	64	I/I	I	I	15.3494	11.2607	15.3494	Yes	Yes	Yes	Yes	No	Yes	Yes	Yes	No	No	No	No	No	Yes	No	Yes	Yes	No	No	No	Yes	No	No	Yes	No	No	No	No	Yes	Yes	Yes	Yes	Yes	17	Yes	Yes	Yes	No	Yes	Yes
Belo Horizonte	Swab	Female	66	D/D	D	D	12.2395	11.1034	12.2022	Yes	Yes	No	Yes	Yes	No	No	Yes		No	No	No	No	Yes	No	No	No	No	No	No	No	No	No	No	No	No	No	No	Yes	Yes	Yes	No	No	13	Yes	No	No	No	No	No
Belo Horizonte	Swab	Male	63	D/D	D	D				Yes	Yes	No	Yes	No	No	No	Yes	No	No	No	No	No	Yes	No	No	No	No	No	No	No	No	No	No	No	No	No	No	Yes	Yes	Yes	Yes	Yes	18	Yes	Yes	Yes	Yes	Yes	Yes
Belo Horizonte	Swab	Female	92	D/D	D	D	4.14347	4.14347	6.76129	Yes	Yes	No	Yes		No	No	Yes	Yes	Yes	No	No	No	Yes	No	No	No	No	No	No	No	No	No	No	No	No	No	No	Yes	Yes	Yes	Yes	Yes	18	Yes	Yes	Yes	Yes	Yes	Yes
Belo Horizonte	Swab	Female	68	D/D	D	D				Yes	Yes	No	Yes	No	No	No	Yes	No	No	No	No	No	Yes	No	No	No	No	No	No	No	No	No	No	No	No	No	No	Yes	Yes	Yes	Yes	Yes	17	Yes	Yes	No	No	Yes	Yes
Belo Horizonte	Swab	Female	50	D/I	I	D				Yes	No	No	Yes	No	No	No	Yes	No	No	No	No	No	Yes	No	No	No	No	No	No	Yes	Yes	Yes	Yes	No	Yes	No	No	Yes	Yes	Yes	Yes	No	17	Yes	Yes	No	No	Yes	Yes
Belo Horizonte	Swab	Female	46	D/D	D	D				Yes	Yes	Yes	Yes	Yes	No	No	Yes	Yes	Yes	No	Yes	No	Yes	No	No	No	No	No	No	Yes	No	No	No	No	No	No	No	Yes	Yes	Yes	Yes	No	8	Yes	Yes	No	No	Yes	Yes
Belo Horizonte	Swab	Male	31						1.70988	Yes	Yes	No	No	No	Yes	Yes	Yes	No	No	No	No	No	Yes	No	No	No	No	No	No	No	No	No	Yes	No	No	No	No	Yes	Yes	Yes	Yes	No	3	Yes	Yes	No	No	Yes	No
Belo Horizonte	Swab	Female	60	I/I	I	I				Yes	Yes	No	Yes	No	No	No	Yes	No	No	No	No	No	Yes	No	No	No	No	No	No	Yes	Yes	No	Yes	No	No	No	No	Yes	Yes	Yes	Yes	No	15	Yes	Yes	Yes	No	Yes	Yes
Belo Horizonte	Swab	Male	47	I/I	I	I				Yes	Yes	No	Yes	No	Yes	No	Yes	No	No	No	Yes	No	No	No	No	No	No	No	No	Yes	No	No	No	No	No	No	No	Yes	Yes	Yes	Yes	No	5	Yes	Yes	No	No	Yes	Yes
Belo Horizonte	Swab	Female	75	D/D	D	D	17.5029	8.35656	17.0812	Yes	Yes	No	Yes	No	No	No	Yes	Yes	Yes	No	No	No	Yes	Yes	Yes	No	No	No	No	Yes	No	No	No	No	No	No	No	Yes	Yes	Yes	Yes	No	8	Yes	Yes	No	No	Yes	Yes
Belo Horizonte	Swab	Female	83	I/I	I	I	10.6011	4.04706	10.2699	Yes	No	No	Yes	No	No	No	Yes	No	No	No	Yes	No	Yes	No	No	No	No	No	No	Yes	No	No	Yes	No	No	No	No	Yes	Yes	Yes	Yes	Yes	20	Yes	Yes	Yes	Yes	Yes	Yes
Belo Horizonte	Swab	Male	71	D/I	I	D	13.8657	7.87051	8.52419	Yes	Yes	No	Yes	No	Yes	Yes	Yes	No	No	No	No	No	Yes	No	No	No	No	No	No	No	No	No	No	No	No	No	No	Yes	Yes	Yes	Yes	Yes	12	Yes	Yes	No	No	No
Belo Horizonte	Swab	Female	67	D/I	I	D	6.29951	17.5733	13.5414	Yes	Yes	No	Yes	No	No	No	Yes	No	No	No	No	No	Yes	No	No	No	No	No	No	Yes	Yes	No	No	No	No	No	No	Yes	Yes	Yes	Yes	No	3	Yes	Yes	No	No	Yes	Yes
Belo Horizonte	Swab	Female	65	I/I	I	I	14.2364	14.2364	6.28896	Yes	Yes	No	Yes	No	No	No	Yes	Yes	Yes	No	Yes	No	Yes	No	No	No	No	No	No	No	No	No	No	No	No	No	No	Yes	Yes	Yes	Yes	No	7	Yes	Yes	No	No	Yes	Yes
Belo Horizonte	Swab	Female	54	D/D	D	D	9.80611	5.35297	6.4466	Yes	Yes	Yes	Yes	No	No	No	Yes	No	No	No	No	No	Yes	No	No	No	No	No	No	Yes	No	No	Yes	No	Yes	No	No	Yes	Yes	Yes	Yes	No	6	Yes	Yes	No	No	Yes	Yes
Belo Horizonte	Swab	Female	86	I/I	I	I	14.1062	14.1062	11.9852	Yes	Yes	No	Yes	Yes	Yes	No	Yes	No	Yes	No	No	No	Yes	No	No	No	No	No	No	No	No	No	No	No	No	No	No	Yes	Yes	Yes	Yes	Yes	21	Yes	Yes	Yes	Yes	No	No
Belo Horizonte	Swab	Female	33	I/I	I	I	17.9532	12.6077	11.8659	Yes	No	No	No	Yes	No	No	No	No	Yes	No	No	No	Yes	No	No	No	No	No	No	No	No	No	No	No	No	No	No	Yes	Yes	Yes	No	No	17	Yes	Yes	No	No	No	No
Belo Horizonte	Swab	Male	53				14.7793	14.7793	8.60184	Yes	Yes	No	Yes	No	Yes	No	Yes	No	Yes	No	No	No	Yes	No	No	No	Yes	No	No	No	No	No	No	Yes	No	No	No	Yes	Yes	Yes	No	Yes	14	Yes	Yes	Yes	Yes	No	No
Belo Horizonte	Swab	Male	81	D/I	I	D	15.3525	5.75814		Yes	No	No	Yes		No	No	Yes	Yes	No	No	No	No	Yes	No	No	No	No	No	No	No	No	No	No	No	No	No	No	Yes	Yes	Yes	No	Yes	6	Yes	Yes	Yes	Yes	No	No
Belo Horizonte	Swab	Female	55	D/D	D	D	15.8333	8.59347	5.45166	Yes	Yes	No	Yes	No	No	No	Yes	Yes	No	No	No	No	Yes	No	No	No	No	No	No	No	No	No	No	No	No	No	No	Yes	Yes	Yes	Yes	Yes	22	Yes	Yes	Yes		No	No
Belo Horizonte	Swab	Female	80	I/I	I	I	18.2964	10.1917	15.2901	Yes	Yes	No	Yes	No	No	No	Yes	No	No	Yes	No	No	No	No	No	No	No	No	No	No	No	No	No	No	Yes	No	No		Yes	Yes	Yes	Yes	12	Yes	Yes	Yes	No	Yes	Yes
Belo Horizonte	Bal	Male	60	D/D	D	D	13.9406	13.9406	13.0218	Yes	No	No	Yes	No	No	No	Yes	No	No	No	Yes	No	Yes	No	No	Yes	No	No	No	No	No	No	No	No	No	No	No	Yes	Yes	Yes	Yes	Yes	24	Yes	Yes	Yes	Yes	No	No
Belo Horizonte	Bal	Male	69	D/D	D	D				Yes	Yes	No	Yes	No	No	No	Yes	No	No	No	Yes	No	Yes	Yes	Yes	Yes	No	No	No	Yes	Yes	Yes	No	No	No	Yes	No	Yes	Yes	Yes	Yes	Yes	28	Yes	Yes	Yes	Yes	Yes	Yes
Belo Horizonte	Bal	Male	70	D/D	D	D			13.3694	Yes	Yes	No	Yes	No	No	No	Yes	No	No	No	Yes	No	No	No	No	No	No	No	No	Yes	No	No	No	No	No	Yes	No	Yes	Yes	Yes	Yes	No	15	Yes	Yes	Yes	No	No	No
Belo Horizonte	Bal	Female	72	I/I	I	I	11.0692	9.50555	14.7676	Yes	Yes	No	No	No	No	No	Yes	No	No	No	No	No	Yes	No	No	No	No	No	No	No	No	No	Yes	No	Yes	No	No	Yes	Yes	Yes	No	Yes	10	Yes	No	No	Yes	No
Belo Horizonte	Bal	Female	89	D/I	I	D	1.13743	1.13743	1.13743	Yes	Yes	No	Yes	No	No	No	Yes	No	No	Yes	No	No	Yes	No	No	No	No	No	No	No	No	No	No	No	No	No	No	Yes	Yes	Yes	No	Yes		Yes	No	Yes	Yes	No
Belo Horizonte	Bal	Male	48	D/D	D	D	15.4523	15.4523	10.1773	Yes	No	No	No	No	No	No	Yes	Yes	Yes	Yes	No	No	Yes	No	No	Yes	Yes	No	No	No	No	No	No	No	No	No	No	Yes	Yes	Yes	No	Yes	8	Yes	No	No	Yes	No
Belo Horizonte	Bal	Female	62	D/D	D	D	9.42268	19.2144	10.285	Yes	Yes	No	Yes	Yes	No	No	Yes	No	Yes	Yes	No	No	Yes	No	No	Yes	No	No	No	No	No	No	Yes	No	Yes	No	No	Yes	Yes	Yes	Yes	Yes	11	Yes	Yes	Yes	Yes	No
Belo Horizonte	Bal	Female	41	D/D	D	D	10.6141	5.83486	6.53016	Yes	Yes	No	Yes	No	Yes	No	No	No	No	No	Yes	No	Yes	No	No	No	No	No	No	No	No	No	No	No	No	No	No	Yes	Yes	Yes	No	Yes	23	Yes	No	No	Yes	No
Belo Horizonte	Bal	Male	34	I/I	I	I	10.9871	10.9871	11.2103	Yes	Yes	No	Yes		Yes	Yes	Yes		No	No	No	No	Yes	No	No	No	No	No	No	No	No	No	No	No	No	Yes	No	Yes	Yes	Yes	Yes	No	9	Yes	Yes	Yes	Yes	Yes	Yes
Belo Horizonte	Bal	Male	56	D/D	D	D	11.6788	5.22985	6.0907	Yes	Yes	No	Yes	No	Yes	No	Yes	No	No	No	No	No	Yes	No	No	No	No	No	No	Yes	No	No	Yes	No	No	No	No	Yes	Yes	Yes	Yes	No	17	Yes	Yes	No	No	No
Belo Horizonte	Bal	Female	69	D/I	I	D	8.66378	7.00528	9.1867	Yes	Yes	No	Yes	No	No	No	Yes	No	No	No	No	No	Yes	No	No	No	No	No	No	No	No	No	Yes	No	No	No	No	Yes	Yes	Yes	No	Yes	8	Yes	No	Yes	Yes	No
Belo Horizonte	Bal	Male	37	I/I	I	I	13.1273	11.3753	9.33328	Yes	Yes	No	No	Yes	No	No	Yes	Yes	Yes	No	No	No	Yes	No	No	No	No	No	No	No	Yes	No	Yes	No	Yes	No	No	Yes	Yes	Yes	No	Yes	4	Yes	No	No	Yes	No
Belo Horizonte	Bal	Male	58	D/I	I	D	11.3975	7.83903	7.44751	Yes	No	No	No	No	No	No	Yes	No	No	Yes	No	No	Yes	No	No	No	No	No	No	No	No	No	Yes	No	No	No	No	Yes	Yes	Yes	Yes	Yes	29	Yes	Yes	Yes	Yes	No
Belo Horizonte	Bal	Male	83	D/I	I	D	12.1687	2.40023	11.0111	Yes	Yes	No	No	No	Yes	Yes	Yes	Yes	Yes	Yes	No	No	Yes	No	No	Yes	No	No	No	No	No	No	No	No	No	No	No	Yes	Yes	Yes	No	Yes	30	Yes	No	Yes	Yes	No
Belo Horizonte	Bal	Female	50	D/I	I	D	10.689	8.6981	9.67691	Yes	Yes	No	Yes	No	No	No	Yes	Yes	Yes	Yes	No	No	Yes	No	No	No	No	No	No	No	No	No	No	No	No	No	No	Yes	Yes	Yes	Yes	Yes	23	Yes	Yes	Yes	Yes	No
Belo Horizonte	Bal	Male	67	D/I	I	D	16.5782	7.17015	11.5605	Yes	Yes	Yes	Yes	No	No	No	Yes	No	No	No	No	No	Yes	No	No	Yes	No	No	No	No	No	No	No	No	No	No	No	Yes	Yes	Yes	Yes	Yes	17	Yes	Yes	Yes	Yes	No
Belo Horizonte	Bal	Female	69	D/D	D	D	10.0508	10.0508	11.7133	Yes	Yes	No	Yes	No	No	No	Yes	No	Yes	No	No	No	Yes	No	Yes	No	No	No	No	No	No	No	No	No	No	No	No	Yes	Yes	Yes	Yes	Yes	7	Yes	Yes	Yes	Yes	No	No
Belo Horizonte	Bal	Male	80	D/D	D	D	13.2275	10.1947		Yes	No	No	No	No	No	No	Yes	No	No	No	No	No	Yes	Yes	Yes	Yes	No	No	No	No	No	No	Yes	No	Yes	No	No	Yes	Yes	Yes	Yes	Yes	27	Yes	Yes	Yes	Yes	No
Belo Horizonte	Bal	Male	64	D/D	D	D	7.64785	11.3647	18.6861	Yes	Yes	No	Yes	No	Yes	No	Yes	No	No	No	No	No	Yes	No	Yes	No	No	No	No	No	No	No	No	No	No	No	No	Yes	Yes	Yes	No	Yes	13	Yes	No	No	Yes	No
Belo Horizonte	Bal	Male	68	D/I	I	D	8.40254	18.8598	14.711	Yes	Yes	No	Yes	No	No	No	Yes	No	No	No	No	No	Yes	No	No	No	No	No	No	No	No	No	No	No	Yes	No	No	Yes	Yes	Yes	No	Yes	3	Yes	No	No	Yes	No
Belo Horizonte	Bal	Female	42	D/I	I	D	17.7307	14.2487	15.8694	Yes	Yes	No	Yes	No	No	No	Yes	No	No	No	No	No	Yes	No	No	No	No	No	No	No	No	No	No	No	No	No	No	Yes	Yes	Yes	Yes	Yes	8	Yes	Yes	Yes	Yes	Yes	Yes
Belo Horizonte	Bal	Male	85	D/I	I	D	13.3141	9.04719	13.3141	Yes	Yes	No	Yes	No	No	No	Yes	No	No	Yes	No	No	Yes	No	No	No	No	No	No	Yes	No	No	No	No	No	No	No	Yes	Yes	Yes	No	Yes	12	Yes	No	Yes	Yes	No
Belo Horizonte	Bal	Female	40	D/D	D	D	10.7767	6.70114	9.10611	Yes	Yes	No	No	Yes	Yes	Yes	Yes	Yes	Yes	No	No	No	Yes	No	No	No	No	No	No	No	No	No	No	No	No	No	No	Yes	Yes	Yes	No	Yes	9	Yes	No	Yes	Yes	No	No
Belo Horizonte	Bal	Male	82	D/D	D	D	10.2139	5.35575	10.2139	Yes	No	No	No	No	No	No	Yes	Yes	Yes	Yes	No	No	Yes	No	No	No	No	No	No	No	No	No	No	No	No	No	No	Yes	Yes	Yes	No	Yes	28	Yes	No	No	Yes	No
Belo Horizonte	Bal	Female	59	D/I	I	D	15.4416	19.9157		Yes	No	No	Yes	Yes	No	Yes	Yes	Yes	Yes	No	Yes	No	Yes	No	No	No	No	No	No	No	No	No	No	No	No	No	No	Yes	Yes	Yes	Yes	Yes	14	Yes	No	Yes	Yes	No
Belo Horizonte	Bal	Female	85	I/I	I	I	15.391	15.391	19.1242	Yes	No	No	Yes	No	No	No	Yes	No	No	No	No	No	Yes	No	No	No	No	No	No	No	No	No	Yes	No	No	No	No	Yes	Yes	Yes	Yes	No	43	Yes	Yes	Yes	Yes	No
Belo Horizonte	Bal	Male	47	D/I	I	D			4.031	Yes	Yes	No	Yes	No	Yes	No	No	No	No	No	No	No	Yes	No	No	No	No	No	No	No	No	No	Yes	No	No	No	No	Yes	Yes	Yes	Yes	Yes	61	Yes	Yes	Yes	Yes	No
Belo Horizonte	Bal	Male	67	D/D	D	D	13.9655	11.3848	13.0208	Yes	Yes	No	Yes	No	No	No	Yes	No	No	No	No	No	Yes	No	No	No	No	No	No	No	No	No	No	No	No	No	No	Yes	Yes	Yes	No	Yes	12	Yes	No	No	Yes	No
Belo Horizonte	Bal	Male	66	D/D	D	D	9.67926	9.67926	12.0238	Yes	Yes	No	Yes	Yes	Yes	No	Yes	Yes	No	No	No	No	Yes	No	No	No	No	No	No	No	No	No	No	No	No	No	No	Yes	Yes	Yes	No	Yes	11	Yes	Yes	Yes	Yes	Yes	Yes
Belo Horizonte	Bal	Male	72				15.6142	8.34322	7.68146	Yes	Yes	No	Yes	Yes		Yes	Yes	Yes	Yes	Yes	No	No	Yes	No	Yes	No	No	No	No	No	No	No	No	No	No	Yes	No	Yes	Yes	Yes	No	Yes	16	Yes	Yes	Yes	Yes	No	No
Belo Horizonte	Bal	Female	84	I/I	I	I	14.906	14.906	14.5488	Yes	No	No	Yes	No	No	No	Yes	No	No	No	No	No	Yes	No	No	No	No	No	No	No	No	No	No	No	No	No	No	Yes	Yes	Yes	No	Yes	10	Yes	No	No	Yes	No
Belo Horizonte	Bal	Male	63	D/D	D	D	13.3886	12.0568	9.17112	Yes	Yes	No	Yes	No	No	No	Yes	No	No	No	Yes	No	Yes	No	No	Yes	No	No	No	No	No	No	No	No	No	No	No	Yes	Yes	Yes	Yes	Yes	47	Yes	Yes	Yes	Yes	No
Rio de Janeiro	Swab	Male	27	I/I	I	I	5.451	4.73034		Yes	Yes	No	Yes	No	No	No	No	Yes	Yes	No	Yes	No	No	No	No	No	No	No	No	Yes	Yes	Yes	No	No	No		No	No	No	No	No	No	0	No	No	No	No	No
Rio de Janeiro	Swab	Female	50	D/D	D	D	3.68349	4.05515		Yes	Yes	Yes	Yes	Yes	No	No	No	No	No	No	Yes	Yes	Yes	No	No	No	No	No	No	No	Yes	Yes	No	No	No		No	No	No	No	No	No	0	No	No	No	No	No
Rio de Janeiro	Swab	Female	38	D/D	D	D	1.0561	4.42605		Yes	Yes	No	Yes	No	Yes	No	Yes	Yes	No	No	Yes	No	Yes	Yes	No	Yes	No	No	No	Yes	No	No	No	No	No		No	Yes	Yes	No	No	No	0	No	No	No	No	No
Rio de Janeiro	Swab	Male	31	D/D	D	D	3.52087	7.01371		Yes	No	No	Yes	No	No	No	No	Yes	No	No	No	No	No	No	No	No	No	No	No	No	Yes	No	No	No	No		No	No	No	No	No	No	0	No	No	No	No	No
Rio de Janeiro	Swab	Male	49	D/D	D	D	3.51697	4.43687		Yes	Yes	No	No	No	No	No	No	No	No	No	No	No	No	No	No	No	No	No	No	No	No	No	No	No	No		No	No	No	No	No	No	0	No	No	No	No	No
Rio de Janeiro	Swab	Female	23	D/I	I	D	3.10448	5.34296		Yes	Yes	Yes	Yes	Yes	Yes	No	No	Yes	No	No	No	No	Yes	No	No	No	No	No	No	No	Yes	Yes	No	No	No		No	No	No	No	No	No	0	No	No	No	No	No
Rio de Janeiro	Swab	Female	35	D/I	I	D	7.02584	2.40342		Yes	Yes	Yes	No	No	No	No	Yes	Yes	No	No	Yes	No	Yes	Yes	No	Yes	No	No	No	Yes	Yes	Yes	No	No	No		No	Yes	Yes	No	No	No	0	No	No	No	No	No
Rio de Janeiro	Swab	Male	33	D/I	I	D	1.6341	7.22838		Yes	Yes	Yes	Yes	Yes	Yes	No	No	No	No	No	No	No	Yes	No	No	No	No	No	No	Yes	Yes	Yes	No	No	No		No	No	No	No	No	No	0	No	No	No	No	No
Rio de Janeiro	Swab	Male	23	D/D	D	D	1.87967	3.05097		Yes	Yes	Yes	Yes	Yes	No	No	No	No	Yes	Yes	Yes	No	Yes	Yes	No	Yes	No	No	No	Yes	Yes	Yes	No	No	No		No	No	No	No	No	No	0	No	No	No	No	No
Rio de Janeiro	Swab	Male	43	I/I	I	I	1.83975	4.59421		Yes	Yes	Yes	No	No	No	No	No	No	No	No	Yes	No	No	No	No	Yes	No	No	No	Yes	Yes	No	No	No	No		No	No	No	No	No	No	0	No	No	No	No	No
Rio de Janeiro	Swab	Male	33	D/D	D	D	8.0594	2.19663		Yes	Yes	No	Yes	No	No	No	Yes	No	No	No	No	No	No	No	No	No	No	No	No	No	Yes	Yes	No	No	No		No	Yes	Yes	No	No	No	0	No	No	No	No	Yes	Yes
Rio de Janeiro	Swab	Female	37	D/I	I	D	6.12235	3.16134		Yes	No	Yes	No	Yes	No	No	No	Yes	Yes	No	Yes	No	No	No	No	No	No	No	No	Yes	Yes	Yes	No	No	No		No	Yes	Yes	No	No	No	0	No	No	No	No	No
Rio de Janeiro	Swab	Female	41	D/I	I	D	5.84842	7.68187		Yes	No	No	Yes	No	No	No	No	No	No	No	Yes	No	No	No	No	No	No	No	No	No	Yes	Yes	No	No	No		No	No	No	No	No	No	0	No	No	No	No	No
Rio de Janeiro	Swab	Female	42	D/D	D	D	4.99221	6.35962		Yes	Yes	No	Yes	No	No	No	Yes	Yes	Yes	No	No	No	Yes	Yes	No	No	No	No	No	Yes	Yes	Yes	No	No	No		No	Yes	Yes	No	No	No	0	No	No	No	No	Yes	Yes
Rio de Janeiro	Swab	Female	32	D/I	I	D	7.0127	4.4869		Yes	No	No	No	No	No	No	No	No	Yes	No	Yes	No	No	No	No	No	No	No	No	Yes	Yes	Yes	No	No	No		No	No	No	No	No	No	0	No	No	No	No	No
Rio de Janeiro	Swab	Female	52	D/I	I	D	5.65917	4.82553		Yes	No	No	Yes	Yes	No	No	No	No	Yes	No	Yes	No	Yes	Yes	No	Yes	No	No	No	No	No	No	No	No	No		No	No	No	No	No	No	0	No	No	No	No	No
Rio de Janeiro	Swab	Male	42	I/I	I	I	6.37507	4.06399		Yes	No	Yes	Yes	No	Yes	No	No	Yes	No	No	No	No	No	No	No	No	No	No	No	Yes	No	No	No	No	No		No	No	No	No	No	No	0	No	No	No	No	No
Rio de Janeiro	Swab	Female	33	D/I	I	D	8.28997	4.97		Yes	No	Yes	No	No	No	No	No	No	No	No	Yes	No	Yes	Yes	No	Yes	No	No	No	Yes	Yes	Yes	No	No	No		No	Yes	Yes	No	No	No	0	No	No	No	No	No
Rio de Janeiro	Swab	Female	34	D/I	I	D	3.78934	3.9766		Yes	No	No	Yes	Yes	Yes	No	Yes	Yes	Yes	No	No	No	Yes	No	No	No	Yes	Yes	No	No	Yes	Yes	No	No	No		No	No	No	No	No	No	0	No	No	No	No	No
Rio de Janeiro	Swab	Female	55	D/I	I	D	3.95084	4.99267		Yes	Yes	No	Yes	No	Yes	No	No	Yes	No	No	Yes	No	Yes	Yes	No	No	No	No	No	Yes	Yes	Yes	No	No	No		No	No	No	No	No	No	0	No	No	No	No	No
Rio de Janeiro	Swab	Female	33	D/I	I	D	8.07685	3.26696		Yes	No	No	No	No	No	No	No	Yes	No	No	Yes	No	No	No	No	No	No	No	No	Yes	Yes	Yes	No	No	No		No	No	No	No	No	No	0	No	No	No	No	No
Rio de Janeiro	Swab	Male	34	D/I	I	D	5.05226	5.16869		Yes	No	No	No	No	No	No	No	No	No	No	No	No	No	No	No	No	No	No	No	No	Yes	No	No	No	No		No	No	No	No	No	No	0	No	No	No	No	No
Rio de Janeiro	Swab	Female	28	D/D	D	D	6.63357	4.05561		Yes	No	No	Yes	No	Yes	No	No	No	No	No	No	No	No	No	No	No	No	No	No	No	Yes	No	Yes	No	No		No	No	No	No	No	No	0	No	No	No	No	No
Rio de Janeiro	Swab	Female	38	I/I	I	I	5.15306	7.28909		Yes	No	No	No	Yes	Yes	No	No	Yes	Yes	No	Yes	No	Yes	No	No	No	No	No	No	Yes	No	No	No	No	No		No	No	No	No	No	No	0	No	No	No	No	No
Rio de Janeiro	Swab	Female	47	D/I	I	D	6.64879	3.75313		Yes	Yes	Yes	Yes	Yes	No	Yes	Yes	Yes	Yes	No	Yes	No	Yes	Yes	Yes	Yes	Yes	No	No	Yes	Yes	Yes	No	No	No		No	Yes	Yes	No	No	No	0	No	No	No	No	Yes	Yes
Rio de Janeiro	Swab	Female	62	D/I	I	D	5.0316	3.94683		Yes	Yes	Yes	No	No	Yes	No	Yes	No	No	No	Yes	No	Yes	Yes	No	No	No	No	No	No	Yes	Yes	No	No	No		No	No	No	No	No	No	0	No	No	No	No	Yes	Yes
Rio de Janeiro	Swab	Male	28	D/I	I	D	5.1843	2.30171		Yes	Yes	Yes	Yes	No	No	Yes	No	No	No	No	No	No	Yes	Yes	Yes	Yes	No	Yes	No	Yes	Yes	Yes	No	No	No		No	Yes	Yes	No	No	No	0	No	No	No	No	No
Rio de Janeiro	Swab	Male	37	D/I	I	D	7.20389	4.11941		Yes	Yes	No	Yes	No	Yes	No	No	No	No	No	Yes	No	Yes	No	No	No	No	No	Yes	Yes	Yes	Yes	No	No	No		No	No	No	No	No	No	0	No	No	No	No	No
Rio de Janeiro	Swab	Male	28	D/D	D	D	8.40472	5.75182		Yes	Yes	Yes	No	No	Yes	No	No	No	No	No	Yes	No	Yes	No	No	No	No	No	No	Yes	No	No	No	No	No		No	No	No	No	No	No	0	No	No	No	No	Yes	No
Rio de Janeiro	Swab	Female	24	I/I	I	I	6.63291	5.66302		Yes	Yes	No	Yes	Yes	Yes	No	Yes	Yes	Yes	No	Yes	No	Yes	Yes	No	Yes	No	No	Yes	Yes	Yes	Yes	No	No	No		No	No	No	No	No	No	0	No	No	No	No	No
Rio de Janeiro	Swab	Female	34	D/I	I	D	9.13383	4.30145		Yes	Yes	Yes	No	Yes	Yes	No	No	No	Yes	No	Yes	No	Yes	No	No	No	No	No	No	No	Yes	Yes	No	No	No		No	Yes	Yes	No	No	No	0	No	No	No	No	No
Rio de Janeiro	Swab	Female	36	D/D	D	D	5.24487	4.25456		Yes	Yes	Yes	Yes	Yes	Yes	No	Yes	Yes	No	No	Yes	No	Yes	No	No	Yes	No	No	No	Yes	Yes	Yes	No	No	No		No	Yes	Yes	No	No	No	0	No	No	No	No	No
Rio de Janeiro	Swab	Female	35	D/D	D	D	6.84674	6.21516		Yes	No	Yes	Yes	Yes	Yes	No	No	Yes	Yes	No	Yes	No	Yes	Yes	Yes	Yes	Yes	No	No	Yes	Yes	Yes	No	No	No		No	No	No	No	No	No	0	No	No	No	No	No
Rio de Janeiro	Swab	Female	25	D/I	I	D	7.14428	3.02582		Yes	No	Yes	Yes	Yes	Yes	No	No	No	Yes	No	Yes	No	Yes	No	No	No	No	Yes	No	No	Yes	Yes	No	No	No		No	Yes	Yes	No	No	No	0	No	No	No	No	No
Rio de Janeiro	Swab	Male	43	D/I	I	D	7.42773	4.97826		Yes	No	No	Yes	Yes	No	No	No	Yes	Yes	No	Yes	No	No	No	No	Yes	No	No	No	No	Yes	Yes	No	No	No		No	No	No	No	No	No	0	No	No	No	No	No
Rio de Janeiro	Swab	Female	52	D/D	D	D	2.64397	5.20153		Yes	Yes	No	Yes	No	No	No	No	Yes	No	Yes	Yes	No	Yes	Yes	No	Yes	No	No	No	Yes	Yes	Yes	No	No	No		No	No	No	No	No	No	0	No	No	No	No	No
Rio de Janeiro	Swab	Female	40	D/I	I	D	9.03081	4.28786		Yes	No	No	Yes	No	Yes	No	No	No	No	No	Yes	No	No	No	No	Yes	No	No	No	No	Yes	Yes	No	No	No		No	No	No	No	No	No	0	No	No	No	No	No
Rio de Janeiro	Swab	Female	51	D/I	I	D	4.88682	-0.504635		Yes	Yes	Yes	No	No	Yes	Yes	Yes	No	No	No	Yes	No	Yes	Yes	No	No	No	Yes	No	No	Yes	Yes	No	No	No		No	Yes	Yes	No	No	No	0	No	No	No	No	Yes	Yes
Rio de Janeiro	Swab	Female	31	D/D	D	D	2.60704	2.42842		Yes	Yes	No	No	No	No	No	No	No	No	No	Yes	No	No	Yes	No	Yes	No	No	No	No	No	No	No	No	No		No	No	No	No	No	No	0	No	No	No	No	No
Rio de Janeiro	Swab	Female	27	D/I	I	D	4.09135	0.943682		Yes	Yes	No	Yes	No	Yes	No	Yes	No	No	No	Yes	No	Yes	No	No	No	No	No	No	Yes	Yes	Yes	No	No	No		No	Yes	Yes	No	No	No	0	No	No	No	No	No
Rio de Janeiro	Swab	Male	30	D/D	D	D	3.0322	3.42673		Yes	Yes	Yes	Yes	No	No	No	Yes	No	No	No	Yes	No	Yes	No	No	No	No	No	No	No	No	Yes	No	No	No		No	No	No	No	No	No	0	No	No	No	No	No
Rio de Janeiro	Swab	Female	40	D/D	D	D	3.09034	5.44441		Yes	Yes	No	Yes	Yes	No	No	No	Yes	No	No	No	No	No	No	No	Yes	No	No	No	No	Yes	Yes	Yes	No	No		No	No	No	No	No	No	0	No	No	No	No	Yes	Yes
Rio de Janeiro	Swab	Female	54	D/I	I	D	4.17083	3.18657		Yes	No	No	No	No	Yes	No	No	Yes	No	No	Yes	No	Yes	Yes	Yes	Yes	No	No	No	Yes	No	No	No	No	No		No	No	No	No	No	No	0	No	No	No	No	No
Rio de Janeiro	Swab	Male	44	D/I	I	D	6.15612	4.53392		Yes	Yes	Yes	No	No	No	No	No	No	No	No	Yes	No	No	No	No	Yes	No	No	No	Yes	Yes	No	No	No	No		No	No	No	No	No	No	0	No	No	No	No	No
Rio de Janeiro	Swab	Female	25	I/I	I	I	5.1303	2.3659		Yes	Yes	No	Yes	Yes	Yes	No	Yes	Yes	Yes	Yes	Yes	No	Yes	No	No	Yes	No	No	No	Yes	Yes	Yes	No	No	No		No	No	No	No	No	No	0	No	No	No	No	No
Rio de Janeiro	Swab	Female	44	D/I	I	D	2.59145	1.17636		Yes	Yes	Yes	Yes	No	No	No	No	Yes	No	No	Yes	No	Yes	No	No	No	No	No	No	Yes	Yes	Yes	No	No	No		No	Yes	Yes	No	No	No	0	No	No	No	No	No
Rio de Janeiro	Swab	Male	35	I/I	I	I	7.91255	6.81429		Yes	Yes	Yes	Yes	No	No	No	No	No	No	No	Yes	No	Yes	No	No	No	No	No	No	Yes	Yes	Yes	No	No	No		No	No	No	No	No	No	0	No	No	No	No	No
Rio de Janeiro	Swab	Female	31	D/I	I	D	2.33914	1.43189		Yes	No	Yes	No	Yes	No	No	No	Yes	Yes	No	Yes	No	Yes	Yes	No	Yes	No	No	Yes	Yes	Yes	Yes	No	No	No		No	Yes	Yes	No	No	No	0	No	No	No	No	No
Rio de Janeiro	Swab	Female	44	D/I	I	D	-0.943161	-1.60283		Yes	Yes	No	Yes	Yes	Yes	No	Yes	Yes	Yes	No	Yes	Yes	Yes	Yes	Yes	Yes	No	No	No	No	Yes	Yes	No	No	No		No	No	No	No	No	No	0	No	No	No	No	No
Rio de Janeiro	Swab	Female	26	D/D	D	D	10.0324	7.55665		Yes	No	No	Yes	No	No	No	Yes	No	No	No	Yes	No	Yes	No	No	No	No	No	No	Yes	No	No	No	No	No		No	No	No	No	No	No	0	No	No	No	No	No
Rio de Janeiro	Swab	Female	34	D/D	D	D	7.60856	6.91655		Yes	Yes	No	Yes	No	No	No	Yes	No	No	No	Yes	Yes	No	Yes	No	No	No	No	No	No	Yes	Yes	No	No	No		No	Yes	Yes	No	No	No	0	No	No	No	No	No
Rio de Janeiro	Swab	Female	48	I/I	I	I	10.4441	8.34721		Yes	Yes	Yes	Yes	Yes	Yes	No	Yes	Yes	Yes	Yes	Yes	No	Yes	Yes	Yes	Yes	Yes	No	No	Yes	Yes	Yes	No	No	No		No	No	No	No	No	No	0	No	No	No	No	No
Rio de Janeiro	Swab	Female	45	D/D	D	D	7.37393	4.76344		Yes	Yes	Yes	No	Yes	No	No	No	Yes	Yes	No	No	No	Yes	No	No	Yes	Yes	No	No	Yes	Yes	Yes	No	No	No		No	No	No	No	No	No	0	No	No	No	No	No
Rio de Janeiro	Swab	Female	27	I/I	I	I	8.11181	6.38627		Yes	Yes	Yes	Yes	Yes	Yes	No	Yes	Yes	Yes	No	Yes	No	Yes	No	No	No	No	No	No	Yes	Yes	Yes	No	No	No		No	No	No	No	No	No	0	No	No	No	No	No
Rio de Janeiro	Swab	Female	48	D/I	I	D	7.58513	6.82928		Yes	Yes	Yes	Yes	No	No	No	Yes	No	No	No	Yes	Yes	Yes	Yes	Yes	Yes	No	No	No	Yes	Yes	Yes	No	No	No		No	Yes	Yes	No	No	No	0	No	No	No	No	Yes	Yes
Rio de Janeiro	Swab	Female	25	D/I	I	D	9.68086	5.27867		Yes	No	No	Yes	Yes	No	No	Yes	Yes	Yes	No	Yes	No	Yes	No	No	No	Yes	No	No	Yes	Yes	Yes	No	No	No		No	No	No	No	No	No	0	No	No	No	No	No
Rio de Janeiro	Swab	Female	39	D/I	I	D	9.05981	7.83		Yes	Yes	Yes	Yes	No	No	No	No	No	No	No	No	No	No	No	No	No	No	No	No	Yes	Yes	Yes	No	No	No		No	Yes	Yes	No	No	No	0	No	No	No	No	No
Rio de Janeiro	Swab	Female	27	D/I	I	D	10.7129	5.36515		Yes	No	No	Yes	Yes	No	No	No	Yes	Yes	No	Yes	No	No	Yes	No	No	No	No	No	Yes	Yes	Yes	No	No	No		No	No	No	No	No	No	0	No	No	No	No	No
Rio de Janeiro	Swab	Male	58	I/I	I	I	3.00242	-0.586174		Yes	Yes	Yes	Yes	No	No	No	Yes	No	Yes	No	Yes	No	Yes	Yes	No	Yes	No	No	No	Yes	No	No	No	No	No		No	Yes	Yes	No	No	No	0	No	No	No	No	No
Rio de Janeiro	Swab	Male	28	D/I	I	D	5.47198	4.9043		Yes	No	No	Yes	Yes	No	No	No	Yes	Yes	No	No	No	No	No	No	No	No	No	No	No	Yes	Yes	No	No	No		No	No	No	No	No	No	0	No	No	No	No	No
Rio de Janeiro	Swab	Female	50	D/I	I	D	3.98217	2.81629		Yes	Yes	Yes	Yes	Yes	Yes	Yes	Yes	Yes	Yes	No	Yes	Yes	Yes	Yes	Yes	Yes	No	Yes	No	Yes	Yes	Yes	No	No	No		Yes	Yes	Yes	No	No	No	0	No	No	No	No	No
Rio de Janeiro	Swab	Female	64				3.59072	2.99656		Yes	Yes	No	Yes	No	Yes	No	No	Yes	No	No	No	No	Yes	Yes	No	Yes	No	No	No	No	No	No	No	No	No		No	Yes	Yes	No	No	No	0	No	No	No	No	Yes	Yes
Rio de Janeiro	Swab	Female	34	D/I	I	D	6.26112	4.01584		Yes	Yes	No	No	No	No	No	No	Yes	No	No	Yes	No	No	No	No	No	No	No	No	No	Yes	Yes	No	No	No		No	Yes	Yes	No	No	No	0	No	No	No	No	Yes	Yes
Rio de Janeiro	Swab	Female	56	D/I	I	D	4.58451	3.61296		Yes	No	Yes	Yes	No	Yes	No	No	No	No	No	Yes	No	Yes	Yes	No	No	No	No	No	No	Yes	Yes	No	No	No		No	Yes	Yes	No	No	No	0	No	No	No	No	No
Rio de Janeiro	Swab	Female		D/I	I	D	8.54473	8.82798		Yes	Yes	No	Yes	Yes	Yes	No	Yes	Yes	Yes	No	Yes	No	Yes	Yes	No	No	No	No	Yes	Yes	Yes	Yes	No	No	No		No	No	No	No	No	No	0	No	No	No	No	No
Rio de Janeiro	Swab	Female	41	I/I	I	I	4.91598	4.58865		Yes	No	No	Yes	Yes	Yes	No	No	No	Yes	No	Yes	No	Yes	No	No	No	No	No	No	No	No	No	No	No	No		No	No	No	No	No	No	0	No	No	No	No	No
Rio de Janeiro	Swab	Female	27	D/I	I	D	2.36371	5.33553		Yes	No	No	Yes	Yes	No	No	No	No	Yes	No	Yes	No	No	No	No	No	No	No	No	Yes	Yes	Yes	No	No	No		No	No	No	No	No	No	0	No	No	No	No	No
Rio de Janeiro	Swab	Female	46	D/I	I	D	3.06221	3.50846		Yes	Yes	Yes	Yes	No	Yes	No	No	Yes	Yes	No	Yes	No	Yes	No	No	Yes	No	No	No	No	Yes	Yes	No	No	No		No	Yes	Yes	No	No	No	0	No	No	No	No	No
Rio de Janeiro	Swab	Female	23	D/D	D	D	4.00776	3.03737		Yes	Yes	No	Yes	Yes	No	No	No	Yes	Yes	No	Yes	No	No	No	No	No	No	No	No	Yes	Yes	Yes	No	No	No		No	No	No	No	No	No	0	No	No	No	No	No
Rio de Janeiro	Swab	Female	36	D/I	I	D	3.81097	2.45986		Yes	Yes	Yes	Yes	Yes	Yes	Yes	No	Yes	No	No	Yes	Yes	Yes	Yes	No	Yes	No	No	No	Yes	Yes	Yes	No	No	No		No	No	No	No	No	No	0	No	No	No	No	No
Rio de Janeiro	Swab	Female	26	D/D	D	D	5.03461	2.91716		Yes	No	No	Yes	Yes	Yes	No	Yes	Yes	No	No	Yes	No	Yes	No	No	No	No	No	No	Yes	Yes	Yes	No	No	No		No	No	No	No	No	No	0	No	No	No	No	No
Rio de Janeiro	Swab	Female	44	D/D	D	D	3.05055	-2.01872		Yes	Yes	Yes	Yes	No	No	Yes	No	Yes	Yes	No	Yes	No	Yes	Yes	No	No	No	No	No	Yes	Yes	Yes	No	No	No		No	Yes	Yes	No	No	No	0	No	No	No	No	No
Rio de Janeiro	Swab	Male	30	I/I	I	I	5.6106	4.47895		Yes	Yes	No	Yes	Yes	No	No	Yes	Yes	No	Yes	Yes	Yes	Yes	No	No	No	Yes	No	No	Yes	Yes	Yes	No	No	No		No	No	No	No	No	No	0	No	No	No	No	No
Rio de Janeiro	Swab	Female	28	D/I	I	D	5.15563	1.5448		Yes	No	No	Yes	No	No	No	Yes	No	No	No	Yes	No	Yes	No	No	Yes	No	No	No	Yes	No	No	No	No	No		No	No	No	No	No	No	0	No	No	No	No	No
Rio de Janeiro	Swab	Female	27	D/D	D	D	2.58224	2.66244		Yes	Yes	Yes	Yes	No	Yes	No	Yes	Yes	No	No	Yes	No	Yes	No	No	No	No	No	No	Yes	Yes	Yes	No	No	No		No	No	No	No	No	No	0	No	No	No	No	No
Rio de Janeiro	Swab	Female	27	I/I	I	I	8.40663	6.70951		Yes	Yes	No	Yes	Yes	No	No	No	Yes	Yes	Yes	Yes	No	Yes	No	No	Yes	No	No	No	Yes	Yes	Yes	No	No	No		No	No	No	No	No	No	0	No	No	No	No	No
Rio de Janeiro	Swab	Female	26	I/I	I	I	5.72455	7.1685		Yes	No	No	Yes	Yes	No	No	No	Yes	Yes	No	No	No	No	Yes	No	No	No	No	No	No	Yes	Yes	No	No	No		No	No	No	No	No	No	0	No	No	No	No	No
Rio de Janeiro	Swab	Female	25	I/I	I	I	5.84424	4.95823		Yes	No	No	No	No	No	No	No	No	No	No	Yes	No	No	No	No	No	No	No	No	Yes	Yes	No	No	No	No		No	No	No	No	No	No	0	No	No	No	No	No
Rio de Janeiro	Swab	Male	36	I/I	I	I	3.67954	2.69102		Yes	Yes	No	Yes	No	No	No	No	No	No	No	Yes	No	No	No	No	No	No	No	No	Yes	Yes	Yes	No	No	No		No	Yes	Yes	No	No	No	0	No	No	No	No	No
Rio de Janeiro	Swab	Female	36	D/D	D	D	6.50111	6.45454		Yes	Yes	No	Yes	No	No	No	No	Yes	No	No	Yes	No	No	No	No	No	No	No	No	No	Yes	Yes	No	No	No		No	No	No	No	No	No	0	No	No	No	No	Yes	Yes
Rio de Janeiro	Swab	Female	36	D/I	I	D	6.01256	5.72372		Yes	No	No	No	No	Yes	No	No	No	No	No	Yes	No	Yes	No	No	No	No	Yes	No	Yes	Yes	Yes	No	No	No		No	No	No	No	No	No	0	No	No	No	No	No
Rio de Janeiro	Swab	Female	40	D/D	D	D	9.02298	7.63439		Yes	Yes	No	Yes	No	No	No	No	No	No	No	Yes	Yes	Yes	Yes	No	Yes	No	No	No	No	Yes	Yes	No	No	No		No	No	No	No	No	No	0	No	No	No	No	No
Rio de Janeiro	Swab	Male	34	D/D	D	D	9.06173	7.01833		Yes	No	No	Yes	Yes	No	No	No	Yes	No	Yes	Yes	No	Yes	No	No	No	No	No	No	Yes	No	No	No	No	No		No	No	No	No	No	No	0	No	No	No	No	Yes	Yes
Rio de Janeiro	Swab	Female		I/I	I	I	7.1718	6.05009		Yes	No	No	Yes	Yes	Yes	No	No	No	Yes	No	Yes	Yes	No	Yes	No	No	No	No	No	Yes	Yes	Yes	No	No	No		No	No	No	No	No	No	0	No	No	No	No	No
Rio de Janeiro	Swab	Female	30	I/I	I	I	5.85744	5.41805		Yes	Yes	No	No	No	Yes	No	No	No	No	No	Yes	No	No	Yes	No	No	No	No	No	Yes	Yes	Yes	No	No	No		No	No	No	No	No	No	0	No	No	No	No	No
Rio de Janeiro	Swab	Female	27	D/D	D	D	8.78085	6.30678		Yes	Yes	Yes	Yes	Yes	Yes	No	No	Yes	Yes	No	Yes	Yes	Yes	Yes	Yes	Yes	No	No	No	Yes	Yes	Yes	No	No	No		No	Yes	Yes	No	No	No	0	No	No	No	No	No
Rio de Janeiro	Swab	Male	67	D/D	D	D	6.43312	3.55566		Yes	Yes	No	Yes	No	No	No	No	No	No	No	No	No	No	No	No	No	No	No	No	Yes	No	No	No	No	No		No	No	No	No	No	No	0	No	No	No	No	No
Rio de Janeiro	Swab	Male	30	D/I	I	D	7.75671	5.55819		Yes	No	No	Yes	Yes	Yes	No	Yes	Yes	Yes	Yes	Yes	No	Yes	Yes	No	No	No	No	No	Yes	Yes	Yes	No	No	No		No	No	No	No	No	No	0	No	No	No	No	Yes	No
Rio de Janeiro	Swab	Male	44	D/I	I	D	5.34991	4.22525		Yes	Yes	Yes	Yes	No	No	No	Yes	No	No	No	Yes	No	Yes	Yes	Yes	Yes	No	No	No	Yes	Yes	Yes	No	No	No		No	Yes	Yes	No	No	No	0	No	No	No	No	No
Rio de Janeiro	Swab	Male	46	D/I	I	D	7.37097	7.40522		Yes	Yes	Yes	Yes	No	No	No	No	No	No	No	Yes	No	No	No	No	Yes	No	No	No	Yes	No	No	No	No	No		No	No	No	No	No	No	0	No	No	No	No	No
Rio de Janeiro	Swab	Female	45	I/I	I	I	5.74786	4.44435		Yes	No	No	No	Yes	Yes	No	No	No	Yes	No	Yes	No	Yes	No	No	No	No	No	No	Yes	Yes	Yes	No	No	No		No	Yes	Yes	No	No	No	0	No	No	No	No	No
Rio de Janeiro	Swab	Female	25	D/I	I	D	8.90013	7.81081		Yes	No	No	No	Yes	No	No	No	No	Yes	No	Yes	No	Yes	No	No	No	No	No	Yes	No	Yes	Yes	No	No	No		No	No	No	No	No	No	0	No	No	No	No	No
Rio de Janeiro	Swab	Male	34	D/I	I	D	6.57225	2.28676		Yes	Yes	Yes	Yes	Yes	Yes	No	Yes	Yes	Yes	No	Yes	No	Yes	No	No	No	No	No	No	Yes	Yes	No	No	No	No		No	Yes	Yes	No	No	No	0	No	No	No	No	No
Rio de Janeiro	Swab	Female	58	D/I	I	D	5.98062	4.07156		Yes	Yes	No	Yes	Yes	No	No	No	No	No	No	Yes	No	Yes	No	No	Yes	No	No	No	Yes	Yes	Yes	No	No	No		No	No	No	No	No	No	0	No	No	No	No	No
Rio de Janeiro	Swab	Male	25	D/I	I	D	6.27971	2.01855		Yes	Yes	No	Yes	No	Yes	No	No	No	No	No	No	Yes	No	No	No	No	Yes	No	No	Yes	No	No	No	No	No		No	No	No	No	No	No	0	No	No	No	No	No
Rio de Janeiro	Swab	Female	59	D/I	I	D	7.62055	5.13092		Yes	No	No	Yes	No	Yes	No	No	Yes	No	No	Yes	No	Yes	No	No	Yes	No	No	No	No	Yes	Yes	No	No	No		No	No	No	No	No	No	0	No	No	No	No	No
Rio de Janeiro	Swab	Female	26	D/I	I	D	9.21981	3.64733		No	No	No	No	No	No	No	No	No	No	No	No	No	No	No	No	No	No	No	No	No	No	No	No	No	No		No	No	No	No	No	No	0	No	No	No	No	No
Rio de Janeiro	Swab	Male	28	D/I	I	D	7.18888	2.87865		Yes	Yes	Yes	Yes	No	No	No	No	No	Yes	No	No	No	Yes	No	No	No	No	No	No	No	Yes	Yes	No	No	No		No	Yes	Yes	No	No	No	0	No	No	No	No	No
Rio de Janeiro	Swab	Male	36	D/D	D	D	2.72555	3.2455		Yes	No	No	Yes	Yes	Yes	No	No	Yes	Yes	No	Yes	No	Yes	No	No	No	No	No	No	Yes	Yes	No	No	No	No		No	Yes	Yes	No	No	No	0	No	No	No	No	No
Rio de Janeiro	Swab	Male	36	D/I	I	D	7.40628	4.00863		Yes	Yes	No	Yes	No	No	No	No	No	No	No	Yes	No	Yes	No	No	No	No	No	No	Yes	Yes	Yes	No	No	No		No	No	No	No	No	No	0	No	No	No	No	No
Rio de Janeiro	Swab	Female	42	D/I	I	D	3.87708	3.37039		Yes	Yes	Yes	Yes	Yes	No	No	No	Yes	Yes	No	Yes	No	No	No	No	No	No	No	No	No	No	Yes	No	No	No		No	No	No	No	No	No	0	No	No	No	No	No
Rio de Janeiro	Swab	Male	39	D/D	D	D	5.76636	1.39374		Yes	No	Yes	Yes	Yes	No	No	Yes	Yes	Yes	No	No	No	Yes	Yes	No	Yes	No	No	No	Yes	No	No	No	No	No		No	Yes	Yes	No	No	No	0	No	No	No	No	No
Rio de Janeiro	Swab	Female	27	I/I	I	I	4.16729	4.28265		Yes	Yes	Yes	Yes	No	Yes	No	No	Yes	Yes	Yes	Yes	Yes	Yes	Yes	No	No	No	No	No	Yes	Yes	Yes	No	No	No		No	Yes	Yes	No	No	No	0	No	No	No	No	No
Rio de Janeiro	Swab	Female	51	I/I	I	I	7.67899	4.91498		Yes	Yes	Yes	Yes	Yes	No	No	Yes	Yes	Yes	No	Yes	No	Yes	Yes	Yes	No	Yes	No	No	Yes	Yes	Yes	No	No	No		No	Yes	Yes	No	No	No	0	No	No	No	No	No
Rio de Janeiro	Swab	Female	57	D/D	D	D	5.07427	3.40906		Yes	Yes	Yes	Yes	Yes	No	No	Yes	Yes	No	No	Yes	No	Yes	No	No	Yes	No	No	No	Yes	No	No	No	No	No		No	Yes	Yes	No	No	No	0	No	No	No	No	No
Rio de Janeiro	Swab	Female	63	D/D	D	D	4.04345	5.06438		Yes	No	No	Yes	No	No	No	No	Yes	Yes	Yes	Yes	No	Yes	Yes	No	No	No	No	No	Yes	Yes	No	No	No	No		No	No	No	No	No	No	0	No	No	No	No	No
Rio de Janeiro	Swab	Female	30	D/D	D	D	5.2805	3.28709		Yes	No	No	No	No	Yes	No	No	Yes	Yes	No	No	No	No	No	No	No	No	No	No	No	No	No	No	No	No		No	No	No	No	No	No	0	No	No	No	No	No
Rio de Janeiro	Swab	Female	32	D/D	D	D	7.00904	4.94854		Yes	Yes	No	Yes	No	No	No	Yes	Yes	No	No	Yes	No	No	Yes	No	No	No	No	No	No	No	No	No	No	No		No	No	No	No	No	No	0	No	No	No	No	No
Rio de Janeiro	Swab	Female	43	I/I	I	I	8.94389	5.29399		Yes	No	No	No	No	No	No	No	Yes	No	No	Yes	No	No	No	No	No	No	No	No	No	Yes	Yes	No	No	No		No	No	No	No	No	No	0	No	No	No	No	No
Rio de Janeiro	Swab	Female	53	D/I	I	D	7.20219	4.92555		Yes	No	No	Yes	No	Yes	No	Yes	Yes	No	No	No	Yes	Yes	No	No	No	Yes	No	No	Yes	Yes	Yes	No	No	No		No	Yes	Yes	No	No	No	0	No	No	No	No	No
Rio de Janeiro	Swab	Female	28	D/I	I	D	7.15679	4.47408		Yes	Yes	Yes	Yes	Yes	No	No	No	Yes	Yes	No	No	No	Yes	No	No	Yes	No	No	No	Yes	Yes	No	No	No	No		No	No	No	No	No	No	0	No	No	No	No	No
Rio de Janeiro	Swab	Female	29	D/D	D	D	7.21506	4.35106		Yes	Yes	Yes	No	Yes	Yes	No	No	No	No	No	Yes	No	Yes	Yes	No	Yes	Yes	No	No	No	Yes	Yes	No	No	No		No	No	No	No	No	No	0	No	No	No	No	No
Rio de Janeiro	Swab	Female	34	D/I	I	D	5.62691	5.7634		Yes	Yes	Yes	No	Yes	Yes	No	No	No	Yes	No	Yes	No	Yes	No	No	No	No	No	Yes	Yes	Yes	Yes	No	No	No		No	No	No	No	No	No	0	No	No	No	No	No
Rio de Janeiro	Swab	Female	25	I/I	I	I	7.33087	4.53661		Yes	No	No	No	Yes	No	No	No	Yes	Yes	No	Yes	No	No	Yes	No	No	No	Yes	No	No	Yes	Yes	Yes	No	No		No	No	No	No	No	No	0	No	No	No	No	No
Rio de Janeiro	Swab	Male	41	D/D	D	D	5.3849	4.05094		Yes	Yes	No	Yes	Yes	No	No	No	Yes	Yes	No	Yes	No	No	No	No	No	No	No	No	No	No	No	No	No	No		No	No	No	No	No	No	0	No	No	No	No	No
Rio de Janeiro	Swab	Female	39	D/I	I	D	9.75563	5.72429		Yes	No	No	Yes	Yes	Yes	No	No	Yes	No	No	Yes	No	No	No	No	No	No	No	No	No	Yes	Yes	No	No	No		No	No	No	No	No	No	0	No	No	No	No	No
Rio de Janeiro	Swab	Female	44	I/I	I	I	5.82608	6.87139		Yes	No	No	Yes	Yes	No	No	Yes	Yes	No	Yes	Yes	No	Yes	No	No	No	No	No	No	Yes	Yes	Yes	No	No	No		No	Yes	Yes	No	No	No	0	No	No	No	No	No
Rio de Janeiro	Swab	Female	48	D/D	D	D	3.26495	3.69842		Yes	No	No	No	Yes	Yes	No	No	Yes	Yes	No	Yes	No	No	No	No	No	No	No	No	Yes	Yes	Yes	No	No	No		No	No	No	No	No	No	0	No	No	No	No	No
Rio de Janeiro	Swab	Female	41	D/I	I	D	5.66641	5.52797		Yes	Yes	Yes	Yes	Yes	Yes	No	No	No	No	No	Yes	No	Yes	No	No	Yes	Yes	No	No	Yes	Yes	Yes	No	No	No		No	Yes	Yes	No	No	No	0	No	No	No	No	No
Rio de Janeiro	Swab	Male	47	D/D	D	D	8.85241	5.87894		Yes	Yes	Yes	Yes	No	Yes	No	Yes	No	No	No	No	Yes	Yes	No	No	Yes	Yes	No	No	No	Yes	Yes	No	No	No		No	Yes	Yes	No	No	No	0	No	No	No	No	Yes	Yes
Rio de Janeiro	Swab	Male	36	D/I	I	D	-0.862617	-6.3419		Yes	No	No	Yes	Yes	No	No	No	Yes	Yes	Yes	Yes	No	Yes	Yes	No	Yes	Yes	No	Yes	No	No	No	No	No	No		No	Yes	Yes	No	No	No	0	No	No	No	No	Yes	Yes
Rio de Janeiro	Swab	Male	25	D/I	I	D	-0.22673	-8.80994		Yes	No	No	No	No	No	No	No	Yes	No	No	Yes	Yes	No	No	No	No	Yes	Yes	No	No	Yes	Yes	No	No	No		No	No	No	No	No	No	0	No	No	No	No	No
Rio de Janeiro	Swab	Female	40	I/I	I	I	0.925432	-6.05287		Yes	Yes	Yes	Yes	Yes	Yes	No	No	Yes	Yes	No	Yes	No	Yes	No	No	Yes	Yes	No	No	Yes	Yes	No	No	No	No		No	Yes	Yes	No	No	No	0	No	No	No	No	No
Rio de Janeiro	Swab	Female	24	D/D	D	D	3.08378	-4.49359		Yes	No	No	No	No	No	No	No	No	Yes	No	Yes	No	No	No	No	No	No	No	No	Yes	No	No	No	No	No		No	No	No	No	No	No	0	No	No	No	No	No
Rio de Janeiro	Swab	Male	41	D/I	I	D	2.81648	-4.50854		Yes	No	No	Yes	Yes	No	No	No	No	No	No	No	No	No	No	No	Yes	No	No	No	No	No	No	No	No	No		No	Yes	Yes	No	No	No	0	No	No	No	No	No
Rio de Janeiro	Swab	Male	35	D/I	I	D	-0.247074	-6.84961		Yes	Yes	No	Yes	Yes	No	No	No	Yes	Yes	No	Yes	No	No	No	No	Yes	No	No	No	Yes	No	No	No	No	No		No	Yes	Yes	No	No	No	0	No	No	No	No	No
Rio de Janeiro	Swab	Female	39	D/D	D	D	5.77526	5.30416		Yes	No	No	No	Yes	Yes	Yes	No	Yes	No	No	Yes	No	Yes	No	No	Yes	No	Yes	Yes	Yes	Yes	Yes	No	No	No		No	No	No	No	No	No	0	No	No	No	No	No
Rio de Janeiro	Swab	Male	63	D/I	I	D	-0.391251	-8.36155		Yes	Yes	Yes	Yes	No	No	No	No	No	Yes	Yes	No	No	Yes	Yes	Yes	No	Yes	No	No	Yes	No	No	No	No	No		No	No	No	No	No	No	0	No	No	No	No	No
Rio de Janeiro	Swab	Female	20	D/I	I	D	-0.386568	-7.12626		Yes	No	Yes	No	No	Yes	Yes	No	Yes	Yes	No	Yes	Yes	Yes	Yes	No	No	Yes	No	No	No	No	No	No	No	No		No	No	No	No	No	No	0	No	No	No	No	No
Rio de Janeiro	Swab	Female	39	D/I	I	D	3.70819	-4.16075		Yes	Yes	Yes	Yes	Yes	No	No	No	No	Yes	No	Yes	No	Yes	No	No	No	No	No	No	Yes	Yes	No	No	No	No		No	No	No	No	No	No	0	No	No	No	No	No
Rio de Janeiro	Swab	Female	57	D/D	D	D	4.43911	-3.98978		Yes	Yes	Yes	Yes	Yes	Yes	No	No	Yes	No	No	No	No	Yes	Yes	Yes	Yes	No	Yes	No	Yes	Yes	Yes	No	No	No		No	Yes	Yes	No	No	No	0	No	No	No	No	No
Rio de Janeiro	Swab	Male	53	I/I	I	I	2.56149	-8.20714		Yes	Yes	Yes	Yes	Yes	Yes	Yes	No	Yes	Yes	No	Yes	Yes	Yes	Yes	No	No	No	No	No	Yes	Yes	No	No	No	No		No	No	No	No	No	No	0	No	No	No	No	No
Rio de Janeiro	Swab	Female	52	I/I	I	I	2.66729	-6.87003		Yes	Yes	Yes	Yes	Yes	No	No	No	No	Yes	Yes	Yes	Yes	Yes	Yes	No	No	No	No	No	Yes	Yes	Yes	No	No	No		No	No	No	No	No	No	0	No	No	No	No	No
Rio de Janeiro	Swab	Female	59	D/I	I	D	5.1534	3.40416		Yes	Yes	Yes	Yes	Yes	Yes	No	No	Yes	Yes	Yes	Yes	Yes	Yes	No	No	Yes	No	Yes	No	Yes	Yes	Yes	No	No	No		Yes	No	No	No	No	No	0	No	No	No	No
Rio de Janeiro	Swab	Female	41	D/I	I	D	8.58254	5.61455		Yes	No	No	Yes	No	Yes	Yes	No	No	No	No	Yes	No	No	Yes	No	No	No	No	No	Yes	No	No	No	No	No		No	Yes	Yes	No	No	No	0	No	No	No	No	Yes	No
Rio de Janeiro	Swab	Female	41	D/I	I	D	1.67354	4.93652		Yes	Yes	No	Yes	No	No	No	Yes	Yes	Yes	No	Yes	No	No	No	No	Yes	No	Yes	No	Yes	Yes	No	No	No	No		No	Yes	Yes	No	No	No	0	No	No	No	No	No
Rio de Janeiro	Swab	Female	41	D/I	I	D	4.46286	4.10092		Yes	Yes	No	No	No	No	No	No	No	No	No	No	No	No	No	No	No	No	No	No	No	No	No	Yes	No	No		No	Yes	Yes	No	No	No	0	No	No	No	No	Yes	Yes
Rio de Janeiro	Swab	Male	40	D/D	D	D	2.40705	3.10523		Yes	No	No	Yes	No	No	No	No	Yes	Yes	No	No	No	No	No	No	No	No	No	No	No	No	No	No	No	No		No	Yes	Yes	No	No	No	0	No	No	No	No
Rio de Janeiro	Swab	Female	39	D/D	D	D	4.24637	3.47745		Yes	Yes	No	Yes	Yes	No	No	Yes	No	No	No	Yes	No	No	No	No	No	No	No	No	No	Yes	Yes	Yes	No	No		No	Yes	Yes	No	No	No	0	No	No	No	No	Yes	Yes
Rio de Janeiro	Swab	Male	39	D/I	I	D	5.27993	4.42229		Yes	Yes	No	Yes	No	No	No	Yes	No	No	No	No	No	No	No	No	No	No	No	No	Yes	Yes	Yes	No	No	No		No	Yes	No	Yes	Yes	No	1	No	No	No	No	Yes	Yes
Rio de Janeiro	Swab	Male	41	I/I	I	I	5.43097	4.06992		Yes	Yes	No	Yes	No	No	No	Yes	No	No	No	Yes	No	No	No	No	No	No	No	No	Yes	No	Yes	No	No	No		No	Yes	Yes	No	No	No	0	No	No	No	No	No
Rio de Janeiro	Swab	Male	39	D/D	D	D	6.79304	3.72115		Yes	Yes	No	Yes	No	No	Yes	No	No	No	No	Yes	No	No	No	No	No	No	No	No	Yes	Yes	Yes	Yes	No	No		No	Yes	Yes	No	No	No	0	No	No	No	No	No
Rio de Janeiro	Swab	Female	23	D/I	I	D	6.08925	5.20397		No	No	No	No	No	No	No	No	No	No	No	No	No	No	No	No	No	No	No	No	No	No	No	No	No	No		No	No	No	No	No	No	0	No	No	No	No	No	No
Rio de Janeiro	Swab	Female	39	D/I	I	D	5.65694	2.63609		Yes	Yes	No	No	No	No	No	No	No	No	No	No	No	No	No	No	No	No	No	No	Yes	No	No	No	No	No		No	Yes	Yes	No	No	No	0	No	No	No	No	No
Rio de Janeiro	Swab	Male	40	D/D	D	D	6.81894	3.6956		Yes	Yes	No	Yes	No	No	No	No	No	No	No	No	No	No	Yes	No	No	No	No	No	No	Yes	Yes	No	No	No		No	Yes	Yes	No	No	No	0	No	No	No	No	No
Rio de Janeiro	Swab	Female	23	D/D	D	D	7.45811	5.52498		No	No	No	No	No	No	No	No	No	No	No	No	No	No	No	No	No	No	No	No	No	No	No	No	No	No		No	No	No	No	No	No	0	No	No	No	No	No
Rio de Janeiro	Swab	Male	39	I/I	I	I	4.26668	3.34803		Yes	Yes	No	No	No	Yes	No	No	No	No	No	Yes	No	No	No	No	Yes	No	No	No	Yes	Yes	Yes	No	No	No		No	Yes	Yes	No	No	No	0	No	No	No	No	No
Rio de Janeiro	Swab	Female	41	D/I	I	D	6.86153	5.58426		Yes	No	No	No	No	No	No	No	No	No	No	Yes	No	No	Yes	No	No	No	No	No	No	Yes	Yes	No	No	No		No	Yes	Yes	No	No	No	0	No	No	No	No	No
Rio de Janeiro	Swab	Female	39	D/I	I	D	7.00517	4.11403		Yes	Yes	No	No	No	No	No	No	No	No	No	Yes	No	No	Yes	No	No	No	No	No	No	No	No	No	No	No		No	Yes	Yes	No	No	No	0	No	No	No	No	No
Rio de Janeiro	Swab	Male	54	D/D	D	D	8.28983	6.43516		No	No	No	No	No	No	No	No	No	No	No	No	No	No	No	No	No	No	No	No	No	No	No	No	No	No		No	No	No	No	No	No	0	No	No	No	No	No
Rio de Janeiro	Swab	Female	58	D/D	D	D	6.78823	8.12453		No	No	No	No	No	No	No	No	No	No	No	No	No	No	No	No	No	No	No	No	No	No	No	No	No	No		No	No	No	No	No	No	0	No	No	No	No	Yes	No
Rio de Janeiro	Swab	Male	39	I/I	I	I	3.79143	3.84002		Yes	Yes	No	Yes	No	Yes	No	No	No	Yes	No	Yes	No	No	No	No	Yes	No	No	No	No	Yes	Yes	Yes	No	No		No	Yes	Yes	No	No	No	0	No	No	No	No	Yes	Yes
Rio de Janeiro	Swab	Male	39	D/I	I	D	3.85601	4.79615		Yes	Yes	Yes	Yes	No	No	No	No	No	No	No	No	No	Yes	No	No	No	No	No	No	Yes	Yes	Yes	No	No	No		No	Yes	Yes	No	No	No	0	No	No	No	No	No
Rio de Janeiro	Swab	Male	41	D/D	D	D	7.17011	6.60759		Yes	Yes	No	Yes	No	No	No	Yes	No	No	No	No	No	No	No	No	No	No	No	No	Yes	No	No	Yes	No	No		No	Yes	Yes	No	No	No	0	No	No	No	No	No
Rio de Janeiro	Swab	Male	24	I/I	I	I	9.71633	4.4786		No	No	No	No	No	No	No	No	No	No	No	No	No	No	No	No	No	No	No	No	No	No	No	No	No	No		No	No	No	No	No	No	0	No	No	No	No	Yes	No
Rio de Janeiro	Swab	Female	40	D/D	D	D	5.70573	6.05602		Yes	No	No	Yes	No	No	No	No	No	No	No	Yes	No	No	No	No	No	No	No	No	Yes	No	No	No	No	No		No	Yes	Yes	No	No	No	0	No	No	No	No
Rio de Janeiro	Swab	Male	41	D/D	D	D	8.21755	7.01814		Yes	Yes	No	Yes	No	No	No	Yes	No	No	No	No	No	No	No	No	No	No	No	No	Yes	No	No	Yes	No	No		No	Yes	No	Yes	Yes	No	2	No	No	No	No	Yes	Yes
Rio de Janeiro	Swab	Female	40	D/I	I	D	5.49194	3.44356		Yes	Yes	No	No	No	No	No	No	No	Yes	No	No	No	No	No	No	Yes	No	No	No	Yes	Yes	No	Yes	No	No		No	Yes	Yes	No	No	No	0	No	No	No	No	No
Rio de Janeiro	Swab	Female	39	D/I	I	D	7.35114	4.67966		Yes	No	Yes	No	No	No	No	No	No	No	No	Yes	No	No	No	No	No	No	No	No	No	No	No	No	No	Yes		No	Yes	Yes	No	No	No	0	No	No	No	No	No
Rio de Janeiro	Swab	Male	41	D/I	I	D	4.34563	5.38889		Yes	Yes	Yes	Yes	No	Yes	No	Yes	No	Yes	No	Yes	No	No	Yes	No	Yes	No	No	No	Yes	Yes	No	No	No	No		No	Yes	Yes	No	No	No	0	No	No	No	No	No
Rio de Janeiro	Swab	Male	39	D/I	I	D	5.74695	4.36829		Yes	Yes	No	Yes	No	No	No	No	No	No	No	No	No	No	No	No	No	No	No	No	No	No	No	No	No	No		No	Yes	Yes	No	No	No	0	No	No	No	No	Yes	Yes
Rio de Janeiro	Swab	Male	40	D/D	D	D	9.29829	5.77646		Yes	Yes	No	Yes	No	No	No	Yes	No	No	No	Yes	No	No	No	No	Yes	No	No	No	Yes	No	No	No	No	No		No	Yes	No	Yes	Yes	No	1	No	No	No	No	Yes	Yes
Rio de Janeiro	Swab	Male	39	D/D	D	D	8.29559	5.29016		Yes	Yes	No	Yes	No	No	No	No	Yes	No	No	No	No	No	No	No	No	No	No	No	No	No	No	No	No	No		No	Yes	Yes	No	No	No	0	No	No	No	No	Yes	Yes
Rio de Janeiro	Swab	Male	41	D/I	I	D	6.69792	3.70802		No	No	No	No	No	No	No	No	No	No	No	No	No	No	No	No	No	No	No	No	No	No	No	No	No	No		No	No	No	No	No	No	0	No	No	No	No	No
Rio de Janeiro	Swab	Female	62	D/D	D	D	4.31366	4.31366		No	No	No	No	No	No	No	No	No	No	No	No	No	No	No	No	No	No	No	No	No	No	No	No	No	No		No	No	No	No	No	No	0	No	No	No	No	No
Rio de Janeiro	Swab	Male	39	D/D	D	D	6.76697	2.66891		Yes	No	No	Yes	No	No	No	Yes	No	No	No	No	No	No	No	No	No	No	No	No	No	Yes	No	No	No	No		No	Yes	Yes	No	No	No	0	No	No	No	No	No
Rio de Janeiro	Swab	Female	40	D/I	I	D	11.4259	5.90008		Yes	Yes	Yes	Yes	Yes	No	No	No	Yes	No	No	No	No	No	No	No	No	No	No	No	Yes	No	Yes	No	No	No		No	Yes	Yes	No	No	No	0	No	No	No	No	No
Rio de Janeiro	Swab	Female	40	D/I	I	D	8.90848	2.17932		Yes	Yes	No	Yes	No	No	No	Yes	No	No	No	Yes	No	No	No	No	No	No	No	No	No	No	No	No	Yes	No		No	Yes	Yes	No	No	No	0	No	No	No	No
Rio de Janeiro	Swab	Male	52				6.27247	4.89859		No	No	No	No	No	No	No	No	No	No	No	No	No	No	No	No	No	No	No	No	No	No	No	No	No	No		No	No	No	No	No	No	0	No	No	No	No	No
Rio de Janeiro	Swab	Male	28	D/I	I	D	5.28608	2.42287		No	No	No	No	No	No	No	No	No	No	No	No	No	No	No	No	No	No	No	No	No	No	No	No	No	No		No	No	No	No	No	No	0	No	No	No	No	No
Rio de Janeiro	Swab	Male	40	D/I	I	D	4.53445	5.9324		Yes	Yes	No	No	No	No	No	No	Yes	No	No	No	No	No	No	No	No	No	No	No	No	No	No	No	No	No		No	Yes	Yes	No	No	No	0	No	No	No	No	No
Rio de Janeiro	Swab	Female	40	I/I	I	I	5.64603	5.3474		Yes	No	No	No	No	No	No	Yes	No	No	No	Yes	No	No	No	No	No	No	No	No	No	No	No	No	No	No		No	Yes	Yes	No	No	No	0	No	No	No	No	No
Rio de Janeiro	Swab	Male	41	D/D	D	D	5.54198	4.94747		Yes	Yes	No	Yes	No	No	No	No	Yes	Yes	No	Yes	No	No	No	No	Yes	No	No	No	Yes	Yes	Yes	No	No	No		No	Yes	Yes	No	No	No	0	No	No	No	No	Yes	Yes
Rio de Janeiro	Swab	Female	40	D/I	I	D	6.07331	7.01566		Yes	Yes	No	Yes	No	No	No	No	No	Yes	No	No	No	No	No	No	No	No	No	No	No	No	No	Yes	No	No		No	Yes	Yes	No	No	No	0	No	No	No	No	No
Rio de Janeiro	Swab	Female	41	D/D	D	D	3.64372	5.35032		Yes	Yes	No	Yes	No	No	No	No	No	No	No	No	No	No	No	No	Yes	No	No	No	No	No	Yes	No	No	No		No	Yes	Yes	No	No	No	0	No	No	No	No	No
Rio de Janeiro	Swab	Female	64	D/I	I	D	5.53783	9.46881		Yes	Yes	No	Yes	No	No	No	Yes	No	No	No	No	No	Yes	No	Yes	No	No	No	No	No	No	No	No	No	No		No	Yes	No	Yes	Yes			Yes	No	No	Yes	Yes	Yes
Rio de Janeiro	Swab	Female	68	D/I	I	D	2.69997	3.72433		Yes	Yes	No	No	No	No	No	Yes	No	No	No	No	No	No	No	No	No	No	No	No	No	No	No	No	No	No		No	Yes	No	Yes	No	Yes	11	Yes	No	Yes	No	Yes	Yes
Rio de Janeiro	Swab	Female	66	D/D	D	D	3.34438	1.25396		Yes	Yes	No	Yes	No	No	No	Yes	No	No	No	No	No	No	Yes	No	No	No	No	No	No	No	No	No	No	No		No	Yes	No	Yes	Yes	No	6	Yes	Yes	No	No	Yes	Yes
Rio de Janeiro	Swab	Female	63	D/D	D	D	8.65548	4.17778		Yes	Yes	No	Yes	Yes	No	No	No	No	No	No	No	No	No	No	No	No	No	No	Yes	No	No	No	No	No	No		No	Yes	No	Yes	Yes			Yes	No	No	Yes	Yes	Yes
Rio de Janeiro	Swab	Female	56	D/I	I	D	6.40187	4.90035		Yes	Yes	No	Yes	Yes	No	No	No	No	No	No	Yes	No	No	No	No	Yes	No	No	No	No	No	No	No	No	No		No	Yes	No	Yes	Yes		32	Yes	Yes	No	No	Yes	Yes
Rio de Janeiro	Swab	Male	39	I/I	I	I	5.07352	4.9758		Yes	No	No	Yes	No	No	No	Yes	No	No	No	No	No	No	No	No	Yes	No	No	No	No	Yes	No	No	No	No		No	Yes	No	Yes	Yes	No	5	Yes	Yes	No	No	Yes	Yes
Rio de Janeiro	Swab	Female	41	I/I	I	I	9.30818	4.262		Yes	Yes	No	Yes	No	No	No	Yes	No	No	No	Yes	No	No	Yes	No	No	No	No	No	No	Yes	Yes	No	No	No		No	Yes	No	Yes	Yes	No	11	Yes	No	Yes	No	Yes	Yes
Rio de Janeiro	Swab	Male	54	I/I	I	I	5.35654	4.52025		Yes	Yes	Yes	Yes	No	No	No	Yes	No	No	No	No	No	No	No	No	No	No	No	No	Yes	Yes	No	Yes	No	No		No	Yes	No	Yes	No	Yes	65	Yes	No	No	Yes	Yes	Yes
Rio de Janeiro	Swab	Female	68	I/I	I	I	4.45861	3.95397		Yes	Yes	No	No	No	No	No	No	No	No	No	No	No	No	No	No	No	No	No	No	No	No	No	No	No	No		No	Yes	No	Yes	No	Yes	27	Yes	No	No	Yes	Yes	Yes
Rio de Janeiro	Swab	Female	66	D/D	D	D	5.13519	2.54529		Yes	Yes	No	Yes	No	No	No	Yes	No	No	No	No	No	No	No	No	Yes	No	No	No	No	No	No	Yes	No	No		No	Yes	No	Yes	Yes	No	6	Yes	No	Yes	No	Yes	Yes
Rio de Janeiro	Swab	Female	58	I/I	I	I	7.05488	4.99002		Yes	Yes	No	Yes	No	No	No	Yes	No	No	No	No	No	No	No	No	Yes	No	No	No	Yes	No	No	No	No	No		No	Yes	No	Yes	Yes	No	5	Yes	Yes	No	No	Yes	Yes
Rio de Janeiro	Swab	Male	49	D/D	D	D	7.03242	3.04206		Yes	Yes	No	Yes	No	No	No	Yes	No	No	No	No	No	Yes	No	No	No	No	No	No	Yes	No	No	No	No	No		No	Yes	No	Yes	Yes	No	7	Yes	No	Yes	No	Yes	Yes
Rio de Janeiro	Swab	Male	59	I/I	I	I	8.38437	6.6236		Yes	Yes	No	Yes	No	No	No	Yes	No	No	No	No	No	No	No	No	No	No	No	No	No	No	No	No	No	No		No	Yes	No	Yes	Yes	No	10	Yes	No	Yes	No	Yes	Yes
Rio de Janeiro	Swab	Female	65	D/I	I	D	4.63591	3.47453		Yes	Yes	No	Yes	No	No	No	No	No	No	No	No	No	No	No	No	No	No	No	No	No	No	No	No	No	No		No	Yes	No	Yes	Yes	No	7	Yes	Yes	No	No	Yes
Rio de Janeiro	Swab	Female	62	D/D	D	D	8.72395	4.87418		Yes	Yes	No	Yes	No	No	No	Yes	No	No	No	No	No	No	No	No	No	No	No	No	Yes	No	No	Yes	No	No		No	Yes	No	Yes	No	Yes	54	Yes	No	No	Yes	Yes	Yes
Rio de Janeiro	Swab	Male	39	D/I	I	D	6.39668	5.11172		Yes	Yes	No	Yes	No	Yes	No	Yes	No	No	No	Yes	No	No	No	No	No	No	No	No	Yes	No	No	Yes	No	No		No	Yes	No	Yes	Yes	No	7	Yes	Yes	No	No	Yes	Yes
Rio de Janeiro	Swab	Female	52	D/I	I	D	8.65236	5.74167		Yes	Yes	No	No	No	No	No	No	No	No	No	No	No	Yes	No	No	No	No	No	No	No	No	No	No	No	No		No	Yes	No	Yes	No	Yes	15	Yes	No	No	Yes	Yes	Yes
Rio de Janeiro	Swab	Female		D/I	I	D	4.94474	4.13084		Yes	Yes	No	Yes	No	No	No	Yes	No	No	No	No	No	No	No	No	No	No	No	No	No	No	No	No	No	No		No	Yes	No	Yes	Yes	No	4	Yes	Yes	No	No	Yes	Yes
Rio de Janeiro	Swab	Female		D/I	I	D	12.7738	7.34588		Yes	No	No	Yes	No	No	No	Yes	No	Yes	No	No	No	No	No	No	No	No	No	No	Yes	No	No	No	No	No		No	Yes	No	Yes	Yes	No	5	Yes	Yes	No	No	Yes	Yes
Rio de Janeiro	Swab	Female	42	D/I	I	D	14.185	10.03		Yes	Yes	No	Yes	No	No	No	Yes	No	Yes	No	No	No	No	No	No	No	No	No	No	Yes	No	Yes	No	No	No		No	Yes	No	Yes	No	Yes	60	Yes	No	No	Yes	Yes	Yes
Rio de Janeiro	Swab	Male	39	I/I	I	I	7.80254	6.80316		Yes	Yes	No	Yes	No	No	No	Yes	No	No	No	No	No	No	No	No	No	No	No	No	No	Yes	No	No	No	No		No	Yes	No	Yes	No	Yes	13	Yes	No	Yes	No	Yes	Yes
Rio de Janeiro	Swab	Female	41	D/I	I	D	7.61994	6.09355		Yes	Yes	No	No	No	No	No	Yes	No	No	No	Yes	No	No	No	No	No	No	No	No	Yes	No	No	No	No	No		No	Yes	No	Yes	Yes	No	2	Yes	Yes	No	No	Yes	Yes
Rio de Janeiro	Swab	Male	40	D/D	D	D	6.54215	7.3629		Yes	Yes	No	Yes	Yes	No	No	Yes	No	Yes	No	No	No	No	No	No	No	No	No	No	Yes	No	No	Yes	No	No		No	Yes	No	Yes	Yes	No	3	Yes	Yes	No	No	Yes	Yes
Rio de Janeiro	Swab	Male	39	D/D	D	D	6.84369	3.69129		Yes	Yes	No	Yes	Yes	No	No	Yes	Yes	Yes	No	Yes	No	No	No	Yes	No	No	No	No	Yes	Yes	Yes	Yes	No	No		No	Yes	No	Yes	Yes	No	5	Yes	Yes	No	No	Yes	Yes
Rio de Janeiro	Swab	Female	40	D/I	I	D	4.27001	5.61129		Yes	No	No	Yes	No	No	No	Yes	No	No	No	No	No	No	No	No	No	No	No	No	No	No	No	No	No	No		No	Yes	No	Yes	Yes	No	5	Yes	Yes	No	No	Yes	Yes
Rio de Janeiro	Swab	Female	39	D/I	I	D	5.04468	4.15053		Yes	No	No	No	No	No	No	Yes	No	No	No	No	No	No	No	No	No	No	No	No	No	No	No	No	No	No		No	Yes	No	Yes	Yes	No	9	Yes	Yes	No	No	Yes	Yes
Rio de Janeiro	Swab	Female	40	D/I	I	D	5.16117	3.32361		Yes	Yes	No	Yes	No	No	No	Yes	No	No	No	No	No	No	No	No	No	No	No	No	No	Yes	Yes	Yes	No	No		No	Yes	No	Yes	Yes	No	7	Yes	Yes	No	No	Yes	Yes
Rio de Janeiro	Swab	Male	68	D/I	I	D	8.00814	3.96663		Yes	No	No	No	No	No	No	No	No	No	No	No	No	Yes	No	No	Yes	No	No	No	No	No	No	No	No	No		No	Yes	No	Yes	Yes	No	59	Yes	Yes	No	No	Yes	Yes
Rio de Janeiro	Swab	Female	55	D/I	I	D	11.8442	9.37642		Yes	Yes	No	Yes	No	No	No	Yes	No	Yes	No	No	No	No	No	No	No	No	No	No	Yes	No	No	No	No	No		No	Yes	No	Yes	No	Yes	35	Yes	No	No	Yes	Yes	Yes
Rio de Janeiro	Swab	Female	59	D/I	I	D	7.92398	5.32383		Yes	Yes	No	Yes	No	No	No	Yes	No	No	No	Yes	No	No	No	No	No	No	No	No	No	No	No	No	No	No		No	Yes	No	Yes	Yes	No	12	Yes	Yes	No	No	Yes	Yes
Rio de Janeiro	Swab	Female	64	D/I	I	D	4.92675	4.17497		Yes	No	No	No	No	No	No	Yes	No	No	No	Yes	No	No	No	No	No	No	No	No	Yes	No	No	Yes	No	No		No	Yes	No	Yes	Yes	No	12	Yes	Yes	No	No	Yes	Yes
Rio de Janeiro	Swab	Male	68	D/D	D	D	7.54639	4.71068		Yes	Yes	No	Yes	No	No	No	Yes	No	No	No	No	No	No	No	No	Yes	No	No	No	Yes	No	No	No	No	No		No	Yes	No	Yes	Yes	No	11	Yes	Yes	No	No	Yes	Yes
Rio de Janeiro	Swab	Female	39	D/D	D	D	9.13829	2.42388		Yes	No	No	No	No	No	No	Yes	No	No	No	No	No	No	No	No	No	No	No	No	No	No	No	No	No	No		No	Yes	No	Yes	Yes	No	1	Yes	Yes	No	No	Yes	No
Rio de Janeiro	Swab	Female	41	I/I	I	I	4.03568	5.34439		Yes	Yes	No	Yes	No	No	No	Yes	No	No	No	Yes	No	No	No	No	No	No	No	No	Yes	No	No	No	No	No		No	Yes	No	Yes	Yes	No	11	Yes	No	Yes	No	Yes	Yes
Rio de Janeiro	Swab	Male	36	I/I	I	I	5.17349	3.78819		Yes	Yes	No	Yes	No	No	No	Yes	No	Yes	No	Yes	No	No	No	No	No	No	No	No	Yes	No	No	No	No	No		No	Yes	No	Yes	No	Yes	25	Yes	No	No	Yes	Yes	Yes
Rio de Janeiro	Swab	Male	57	D/I	I	D	6.37832	8.25831		Yes	Yes	No	Yes	No	No	No	No	No	No	No	No	No	No	No	No	No	No	No	No	Yes	No	No	Yes	No	No		No	Yes	No	Yes	Yes	No	5	Yes	Yes	No	No	Yes	Yes
Rio de Janeiro	Swab	Female	53	D/I	I	D	4.26676	-0.71505		Yes	No	Yes	No	No	No	No	Yes	No	No	No	No	No	No	Yes	No	No	No	No	No	No	No	No	Yes	No	No		No	Yes	No	Yes	No	Yes	14	Yes	Yes	No	No	Yes	Yes
Rio de Janeiro	Swab	Female	40	D/D	D	D	4.97819	4.06375		Yes	Yes	No	No	Yes	No	No	Yes	No	Yes	No	Yes	No	No	Yes	No	No	No	No	No	No	No	No	No	No	No		No	Yes	No	Yes	Yes	No	0	Yes	Yes	No	No
[truncated: 54 more columns]
